# Supplementary material for: Six Undescribed Capnosane-Type Macrocyclic Diterpenoids from South China Sea Soft Coral Sarcophyton crassocaule: Structural Determination and Biological Evaluation
Source: MDPI journal article supplement (doi:10.3390/md21120645), 2023-12-18
Supplement: s1 [file s1]

## Table of contents

|                    |                                                                                                  |
|--------------------|--------------------------------------------------------------------------------------------------|
| <b>Figure S1.</b>  | <sup>1</sup> H NMR spectrum (500 MHz) of compound <b>1</b> in CDCl <sub>3</sub>                  |
| <b>Figure S2.</b>  | <sup>13</sup> C NMR spectrum (125 MHz) of compound <b>1</b> in CDCl <sub>3</sub>                 |
| <b>Figure S3.</b>  | HSQC spectrum (500 MHz) of compound <b>1</b> in CDCl <sub>3</sub>                                |
| <b>Figure S4.</b>  | <sup>1</sup> H- <sup>1</sup> H COSY spectrum (500 MHz) of compound <b>1</b> in CDCl <sub>3</sub> |
| <b>Figure S5.</b>  | HMBC spectrum (500 MHz) of compound <b>1</b> in CDCl <sub>3</sub>                                |
| <b>Figure S6.</b>  | ROESY spectrum (500 MHz) of compound <b>1</b> in CDCl <sub>3</sub>                               |
| <b>Figure S7.</b>  | IR spectrum of compound <b>1</b>                                                                 |
| <b>Figure S8.</b>  | HR-ESIMS spectrum of compound <b>1</b>                                                           |
| <b>Figure S9.</b>  | UV spectrum of compound <b>1</b>                                                                 |
| <b>Figure S10.</b> | <sup>1</sup> H NMR spectrum (500 MHz) of compound <b>2</b> in CDCl <sub>3</sub>                  |
| <b>Figure S11.</b> | <sup>13</sup> C NMR spectrum (125 MHz) of compound <b>2</b> in CDCl <sub>3</sub>                 |
| <b>Figure S12.</b> | HSQC spectrum (500 MHz) of compound <b>2</b> in CDCl <sub>3</sub>                                |
| <b>Figure S13.</b> | <sup>1</sup> H- <sup>1</sup> H COSY spectrum (500 MHz) of compound <b>2</b> in CDCl <sub>3</sub> |
| <b>Figure S14.</b> | HMBC spectrum (500 MHz) of compound <b>2</b> in CDCl <sub>3</sub>                                |
| <b>Figure S15.</b> | ROESY spectrum (500 MHz) of compound <b>2</b> in CDCl <sub>3</sub>                               |
| <b>Figure S16.</b> | IR spectrum of compound <b>2</b>                                                                 |
| <b>Figure S17.</b> | HR-ESIMS spectrum of compound <b>2</b>                                                           |
| <b>Figure S18.</b> | UV spectrum of compound <b>2</b>                                                                 |
| <b>Figure S19.</b> | <sup>1</sup> H NMR spectrum (500 MHz) of compound <b>3</b> in CDCl <sub>3</sub>                  |
| <b>Figure S20.</b> | <sup>13</sup> C NMR spectrum (125 MHz) of compound <b>3</b> in CDCl <sub>3</sub>                 |
| <b>Figure S21.</b> | HSQC spectrum (500 MHz) of compound <b>3</b> in CDCl <sub>3</sub>                                |
| <b>Figure S22.</b> | <sup>1</sup> H- <sup>1</sup> H COSY spectrum (500 MHz) of compound <b>3</b> in CDCl <sub>3</sub> |
| <b>Figure S23.</b> | HMBC spectrum (500 MHz) of compound <b>3</b> in CDCl <sub>3</sub>                                |
| <b>Figure S24.</b> | ROESY spectrum (500 MHz) of compound <b>3</b> in CDCl <sub>3</sub>                               |
| <b>Figure S25.</b> | IR spectrum of compound <b>3</b>                                                                 |
| <b>Figure S26.</b> | HR-ESIMS spectrum of compound <b>3</b>                                                           |
| <b>Figure S27.</b> | UV spectrum of compound <b>3</b>                                                                 |
| <b>Figure S28.</b> | <sup>1</sup> H NMR spectrum (500 MHz) of compound <b>4</b> in CDCl <sub>3</sub>                  |
| <b>Figure S29.</b> | <sup>13</sup> C NMR spectrum (125 MHz) of compound <b>4</b> in CDCl <sub>3</sub>                 |
| <b>Figure S30.</b> | HSQC spectrum (500 MHz) of compound <b>4</b> in CDCl <sub>3</sub>                                |
| <b>Figure S31.</b> | <sup>1</sup> H- <sup>1</sup> H COSY spectrum (500 MHz) of compound <b>4</b> in CDCl <sub>3</sub> |
| <b>Figure S32.</b> | HMBC spectrum (500 MHz) of compound <b>4</b> in CDCl <sub>3</sub>                                |
| <b>Figure S33.</b> | ROESY spectrum (500 MHz) of compound <b>4</b> in CDCl <sub>3</sub>                               |
| <b>Figure S34.</b> | IR spectrum of compound <b>4</b>                                                                 |
| <b>Figure S35.</b> | HR-ESIMS spectrum of compound <b>4</b>                                                           |
| <b>Figure S36.</b> | UV spectrum of compound <b>4</b>                                                                 |
| <b>Figure S37.</b> | <sup>1</sup> H NMR spectrum (500 MHz) of compound <b>5</b> in CDCl <sub>3</sub>                  |
| <b>Figure S38.</b> | <sup>13</sup> C NMR spectrum (125 MHz) of compound <b>5</b> in CDCl <sub>3</sub>                 |
| <b>Figure S39.</b> | HSQC spectrum (500 MHz) of compound <b>5</b> in CDCl <sub>3</sub>                                |
| <b>Figure S40.</b> | <sup>1</sup> H- <sup>1</sup> H COSY spectrum (500 MHz) of compound <b>5</b> in CDCl <sub>3</sub> |
| <b>Figure S41.</b> | HMBC spectrum (500 MHz) of compound <b>5</b> in CDCl <sub>3</sub>                                |
| <b>Figure S42.</b> | ROESY spectrum (500 MHz) of compound <b>5</b> in CDCl <sub>3</sub>                               |

|                    |                                                                                                                                                                               |
|--------------------|-------------------------------------------------------------------------------------------------------------------------------------------------------------------------------|
| <b>Figure S43.</b> | IR spectrum of compound <b>5</b>                                                                                                                                              |
| <b>Figure S44.</b> | HR-ESIMS spectrum of compound <b>5</b>                                                                                                                                        |
| <b>Figure S45.</b> | UV spectrum of compound <b>5</b>                                                                                                                                              |
| <b>Figure S46.</b> | <sup>1</sup> H NMR spectrum (500 MHz) of compound <b>6</b> in CDCl <sub>3</sub>                                                                                               |
| <b>Figure S47.</b> | <sup>13</sup> C NMR spectrum (125 MHz) of compound <b>6</b> in CDCl <sub>3</sub>                                                                                              |
| <b>Figure S48.</b> | HSQC spectrum (500 MHz) of compound <b>6</b> in CDCl <sub>3</sub>                                                                                                             |
| <b>Figure S49.</b> | <sup>1</sup> H- <sup>1</sup> H COSY spectrum (500 MHz) of compound <b>6</b> in CDCl <sub>3</sub>                                                                              |
| <b>Figure S50.</b> | HMBC spectrum (500 MHz) of compound <b>6</b> in CDCl <sub>3</sub>                                                                                                             |
| <b>Figure S51.</b> | ROESY spectrum (500 MHz) of compound <b>6</b> in CDCl <sub>3</sub>                                                                                                            |
| <b>Figure S52.</b> | IR spectrum of compound <b>6</b>                                                                                                                                              |
| <b>Figure S53.</b> | HR-ESIMS spectrum of compound <b>6</b>                                                                                                                                        |
| <b>Figure S54.</b> | UV spectrum of compound <b>6</b>                                                                                                                                              |
| <b>Figure S55.</b> | <sup>1</sup> H NMR spectrum (500 MHz) of compound <b>7</b> in CDCl <sub>3</sub>                                                                                               |
| <b>Figure S56.</b> | <sup>13</sup> C NMR spectrum (125 MHz) of compound <b>7</b> in CDCl <sub>3</sub>                                                                                              |
| <b>Figure S57.</b> | Structures of isomers of compounds <b>3</b>                                                                                                                                   |
| <b>Figure S58.</b> | Structures of isomers of compounds <b>4</b>                                                                                                                                   |
| <b>Figure S59.</b> | Structures of isomers of compounds <b>5</b>                                                                                                                                   |
| <b>Figure S60.</b> | Structures of isomers of compounds <b>6</b>                                                                                                                                   |
| <b>Table S1.</b>   | Boltzmann averaged GIAO isotropic magnetic shielding constants ( $\sigma$ ) of compound <b>1</b> calculated at the PCM/mPW1PW91/6-311G(d,p) //B3LYP/6-31G (d) level of theory |
| <b>Table S2.</b>   | DP4+ results obtained using experimental data of compound <b>1</b> versus isomers <b>1a–1h</b>                                                                                |
| <b>Table S3.</b>   | Boltzmann averaged GIAO isotropic magnetic shielding constants ( $\sigma$ ) of compound <b>3</b> calculated at the PCM/mPW1PW91/6-311G(d,p) //B3LYP/6-31G (d) level of theory |
| <b>Table S4.</b>   | DP4+ results obtained using experimental data of compound <b>3</b> versus isomers <b>3a–3h</b>                                                                                |
| <b>Table S5.</b>   | Boltzmann averaged GIAO isotropic magnetic shielding constants ( $\sigma$ ) of compound <b>4</b> calculated at the PCM/mPW1PW91/6-311G(d,p) //B3LYP/6-31G (d) level of theory |
| <b>Table S6.</b>   | DP4+ results obtained using experimental data of compound <b>4</b> versus isomers <b>4a–4h</b>                                                                                |
| <b>Table S7.</b>   | Boltzmann averaged GIAO isotropic magnetic shielding constants ( $\sigma$ ) of compound <b>5</b> calculated at the PCM/mPW1PW91/6-311G(d,p) //B3LYP/6-31G (d) level of theory |
| <b>Table S8.</b>   | DP4+ results obtained using experimental data of compound <b>5</b> versus isomers <b>5a–5d</b>                                                                                |
| <b>Table S9.</b>   | Boltzmann averaged GIAO isotropic magnetic shielding constants ( $\sigma$ ) of compound <b>6</b> calculated at the PCM/mPW1PW91/6-31G(d,p) //B3LYP/6-31G (d) level of theory  |
| <b>Table S10.</b>  | DP4+ results obtained using experimental data of compound <b>6</b> versus isomers <b>6a–6d</b>                                                                                |
| <b>Figure S61.</b> | Correlation plots of compounds <b>1</b> , <b>3–6</b>                                                                                                                          |
| <b>Table S11.</b>  | Crystal data and structure refinement for <b>2</b>                                                                                                                            |

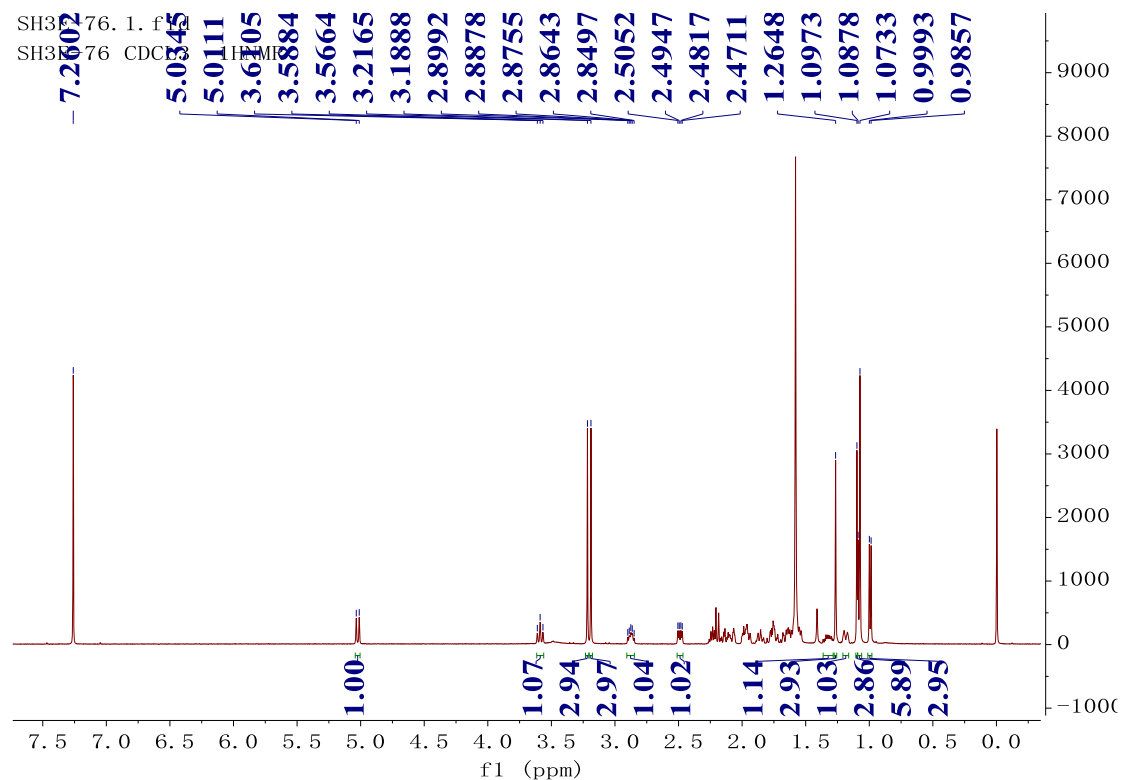

**Figure S1.** <sup>1</sup>H NMR spectrum (500 MHz) of compound **1** in CDCl<sub>3</sub>

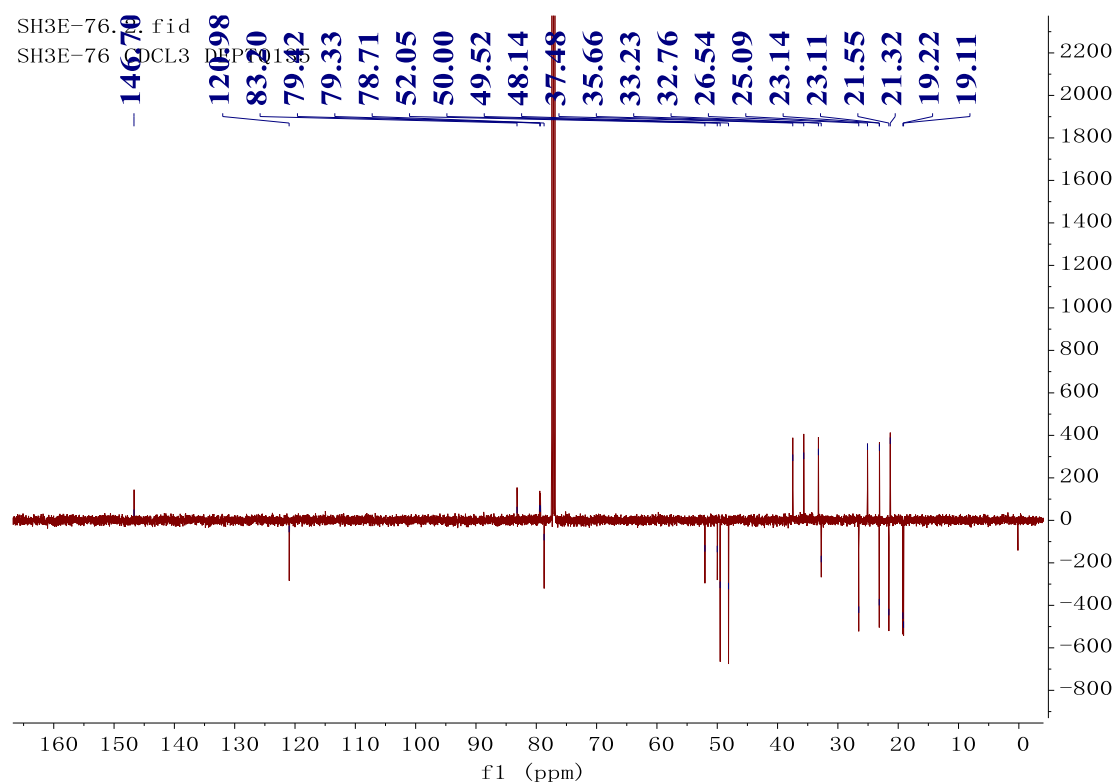

**Figure S2.** <sup>13</sup>C NMR spectrum (125 MHz) of compound **1** in CDCl<sub>3</sub>

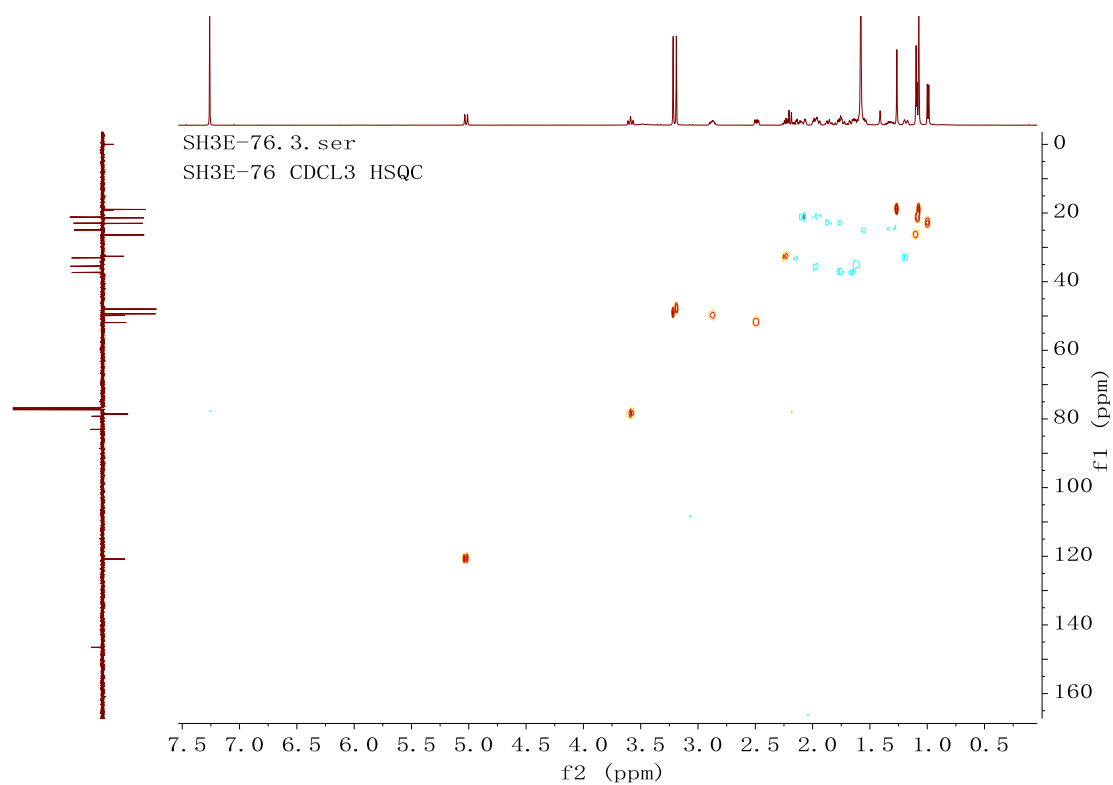

**Figure S3.** HSQC spectrum (500 MHz) of compound **1** in CDCl<sub>3</sub>

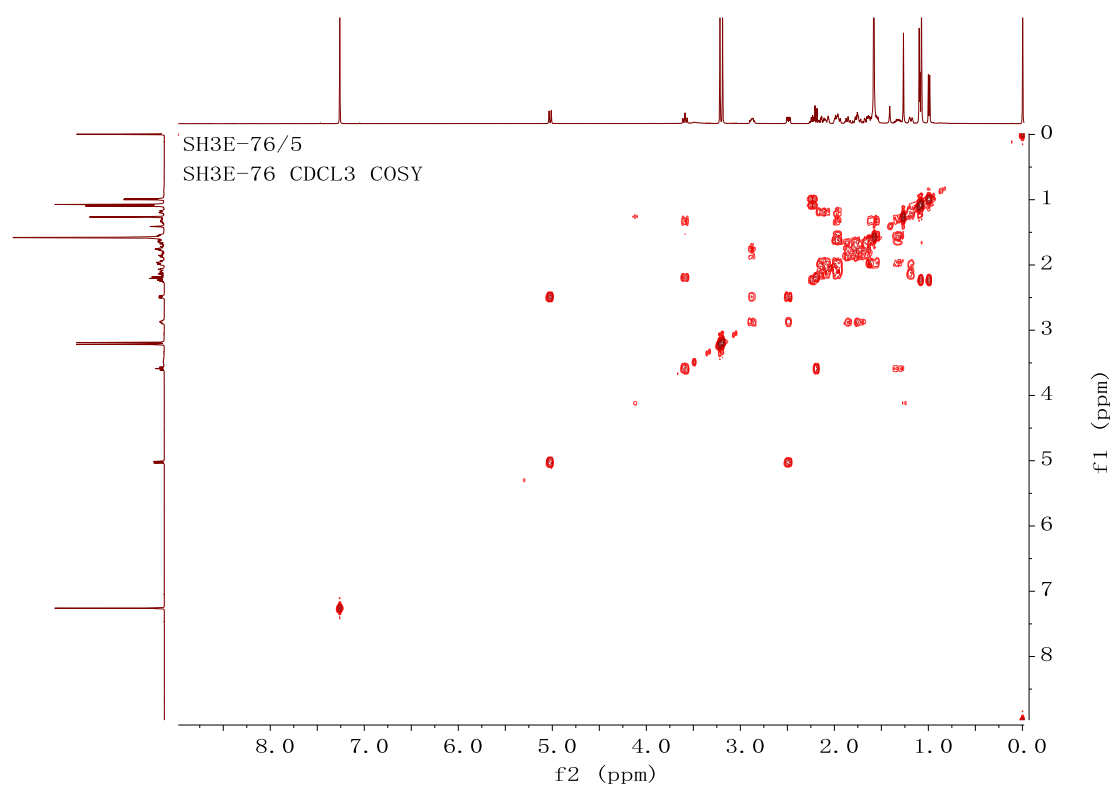

**Figure S4.** <sup>1</sup>H-<sup>1</sup>H COSY spectrum (500 MHz) of compound **1** in CDCl<sub>3</sub>

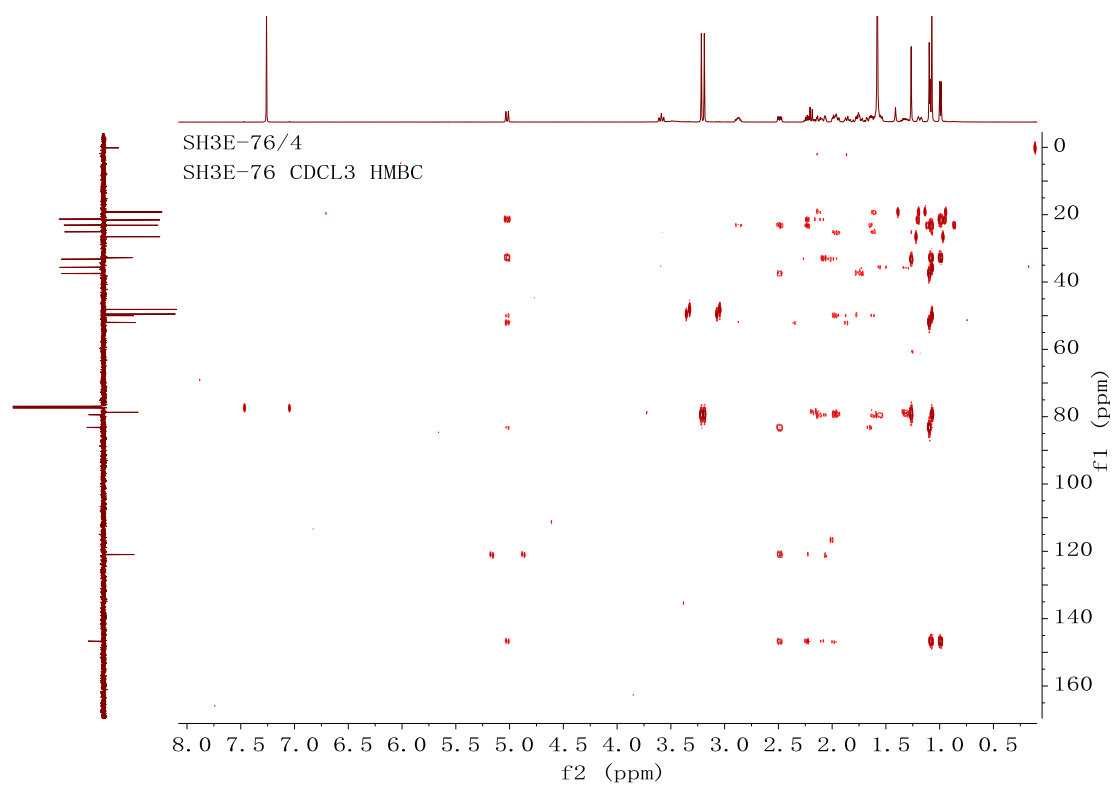

**Figure S5.** HMBC spectrum (500 MHz) of compound **1** in CDCl<sub>3</sub>

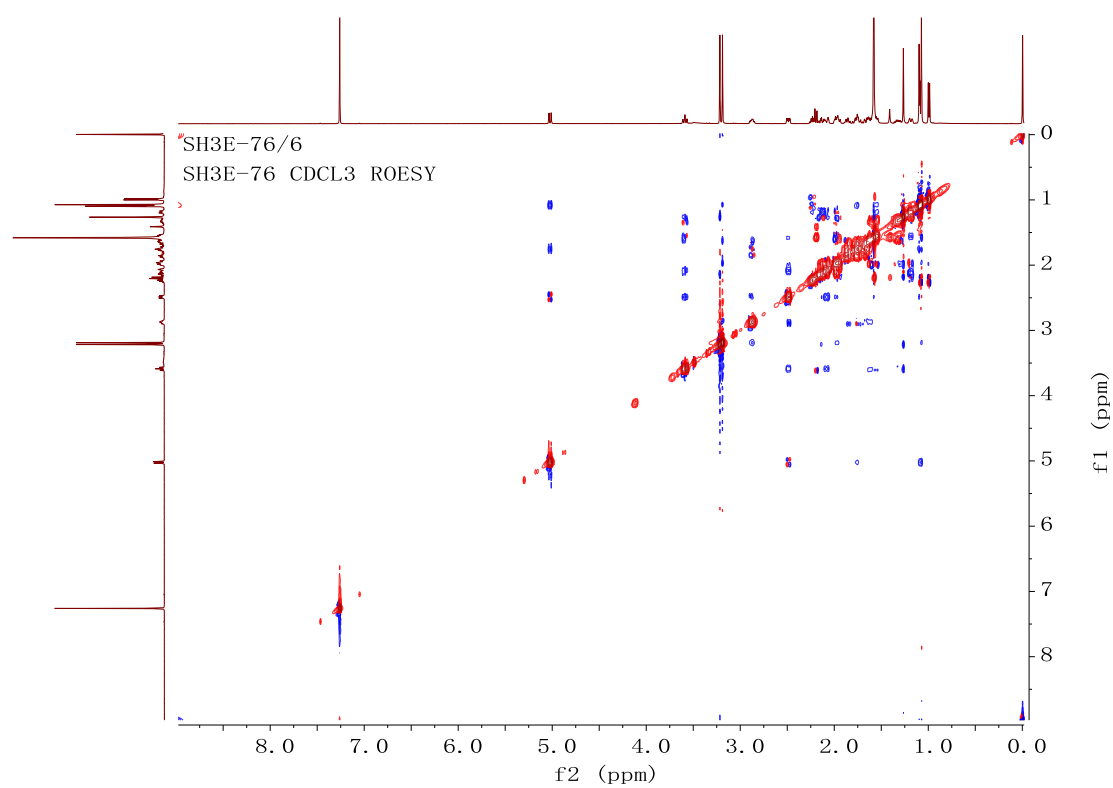

**Figure S6.** ROESY spectrum (500 MHz) of compound **1** in CDCl<sub>3</sub>

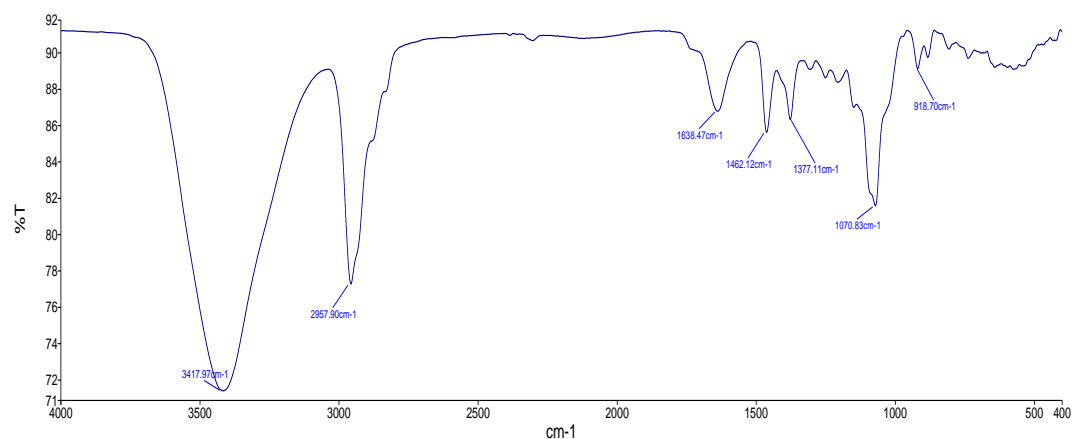

名称 SH3E-76\_1\_1 样品 002 用户 Administrator 日期 星期一, 二月 27 2023

Figure S7. IR spectrum of compound 1

## Mass Spectrum SmartFormula Report

### Analysis Info

Analysis Name D:\2023\B502\20230920\SH3E-76\_BA3\_01\_8716.d  
 Method lc-ms\_as\_ms-1min-20230519.m  
 Sample Name SH3E-76  
 Comment

Acquisition Date 2023-09-20 11:47:50

Operator Demo User  
 Instrument compact 8255754.20156

### Acquisition Parameter

|             |            |                      |          |                  |           |
|-------------|------------|----------------------|----------|------------------|-----------|
| Source Type | ESI        | Ion Polarity         | Positive | Set Nebulizer    | 1.8 Bar   |
| Focus       | Not active | Set Capillary        | 3500 V   | Set Dry Heater   | 220 °C    |
| Scan Begin  | 50 m/z     | Set End Plate Offset | -500 V   | Set Dry Gas      | 4.0 l/min |
| Scan End    | 2500 m/z   | Set Charging Voltage | 2000 V   | Set Divert Valve | Waste     |
|             |            | Set Corona           | 0 nA     | Set APCI Heater  | 0 °C      |

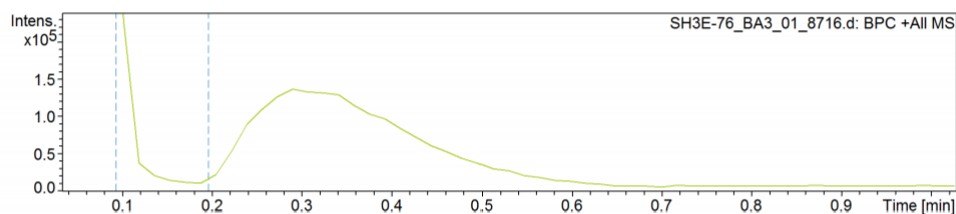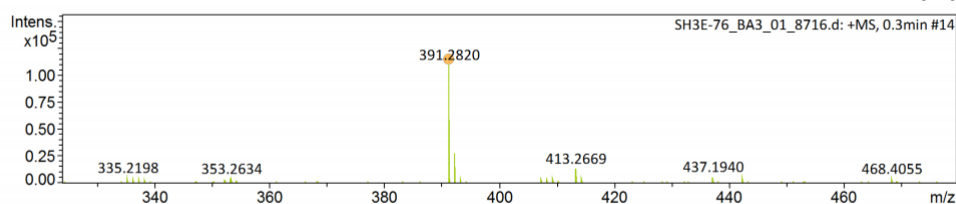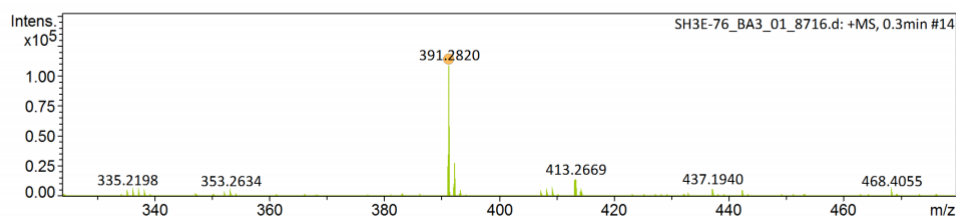

| Meas. m/z | # | Ion Formula | m/z      | err [ppm] | mSigma | # mSigma | Score  | rdB | e <sup>-</sup> Conf | N-Rule | Adduct |
|-----------|---|-------------|----------|-----------|--------|----------|--------|-----|---------------------|--------|--------|
| 391.2820  | 1 | C22H40NaO4  | 391.2819 | -0.3      | 7.7    | 1        | 100.00 | 3.0 | even                | ok     | M+Na   |

Figure S8. HR-ESIMS spectrum of compound 1

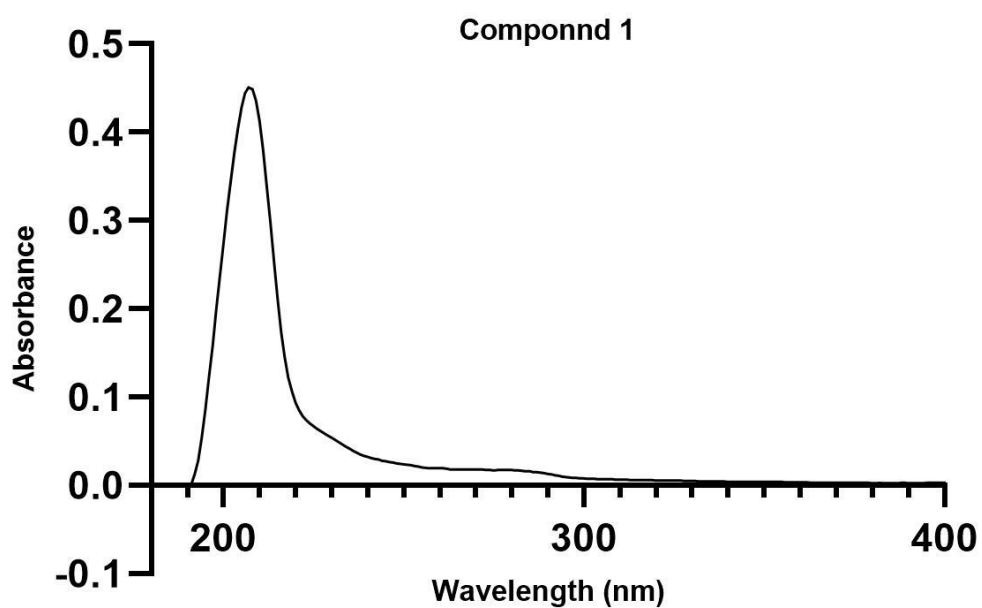

**Figure S9.** UV spectrum of compound 1

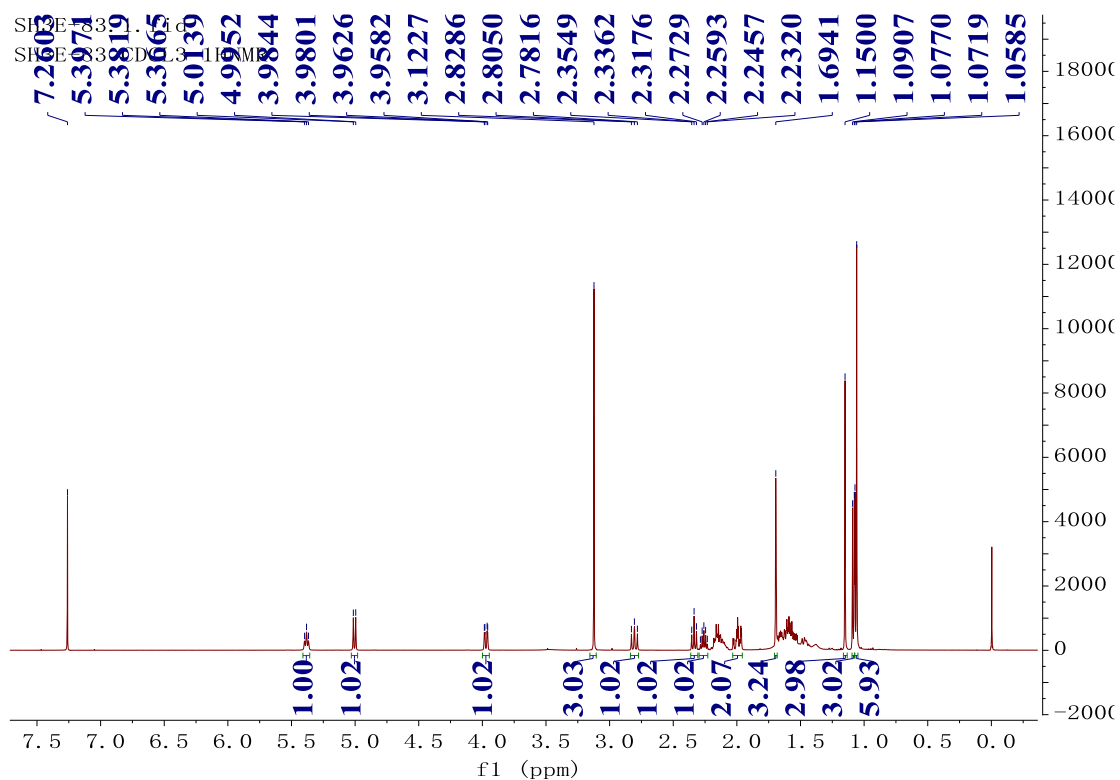

**Figure S10.**  $^1\text{H}$  NMR spectrum (500 MHz) of compound 2 in  $\text{CDCl}_3$

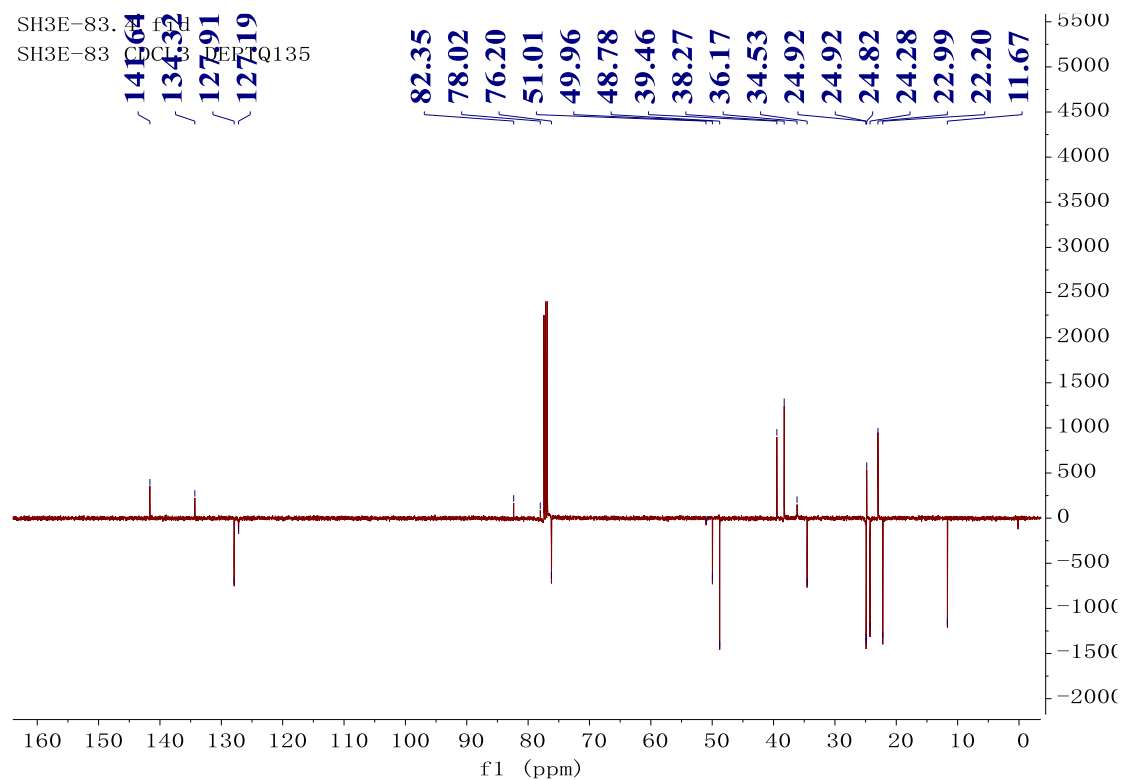

**Figure S11.**  $^{13}\text{C}$  NMR spectrum (125 MHz) of compound **2** in  $\text{CDCl}_3$

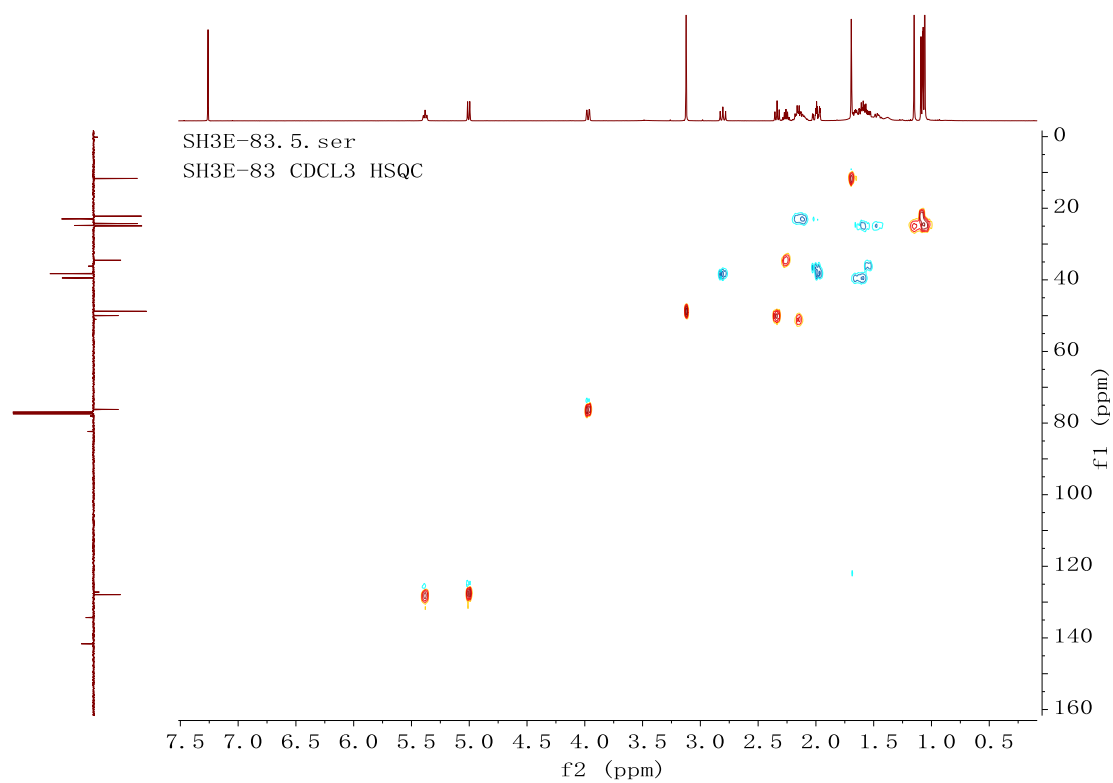

**Figure S12.** HSQC spectrum (500 MHz) of compound **2** in  $\text{CDCl}_3$

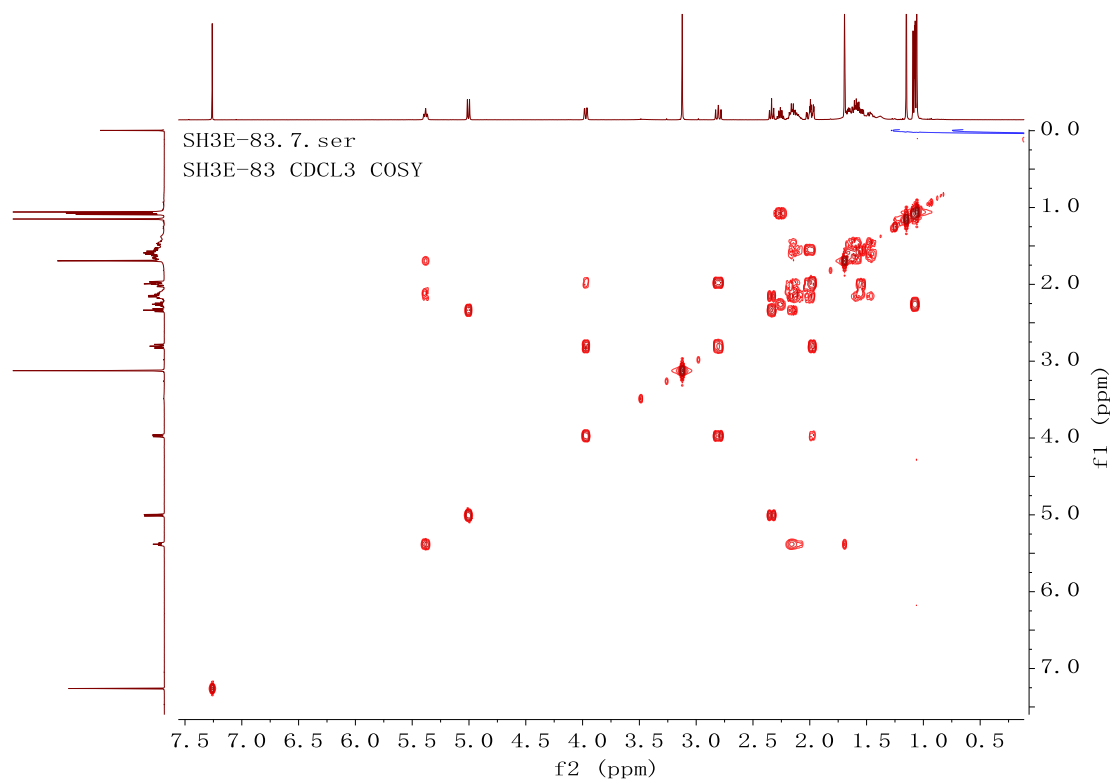

**Figure S13.**  $^1\text{H}$ - $^1\text{H}$  COSY spectrum (500 MHz) of compound **2** in  $\text{CDCl}_3$

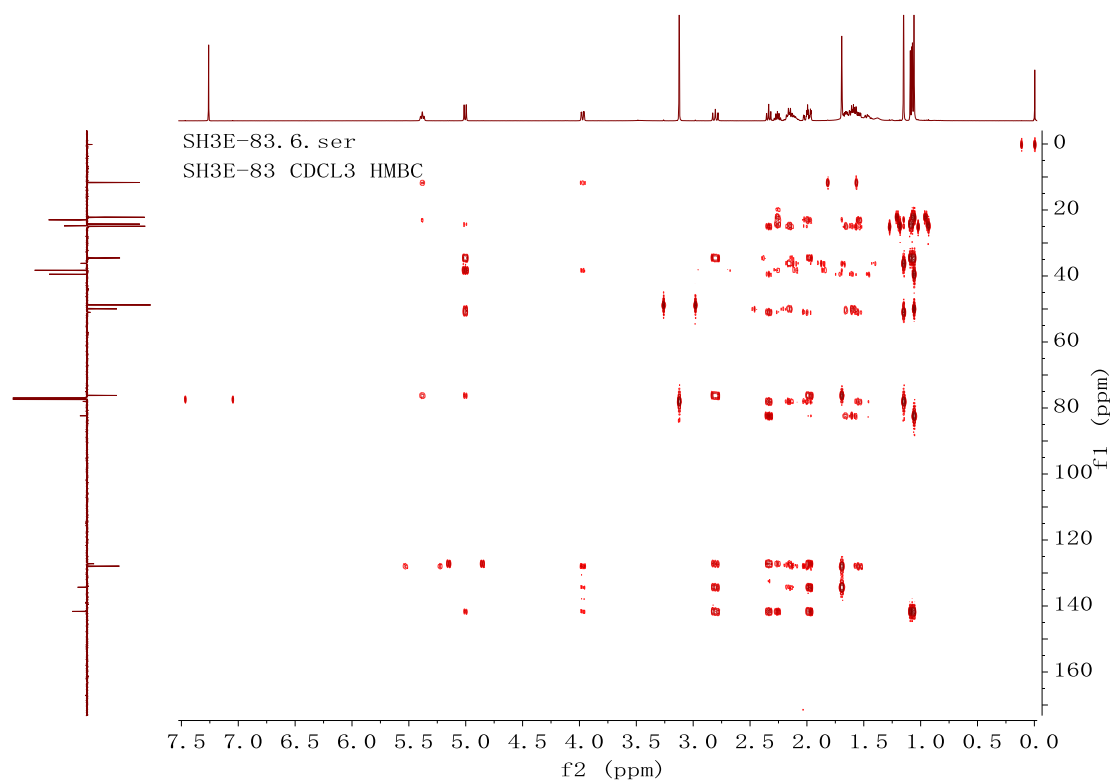

**Figure S14.** HMBC spectrum (500 MHz) of compound **2** in  $\text{CDCl}_3$

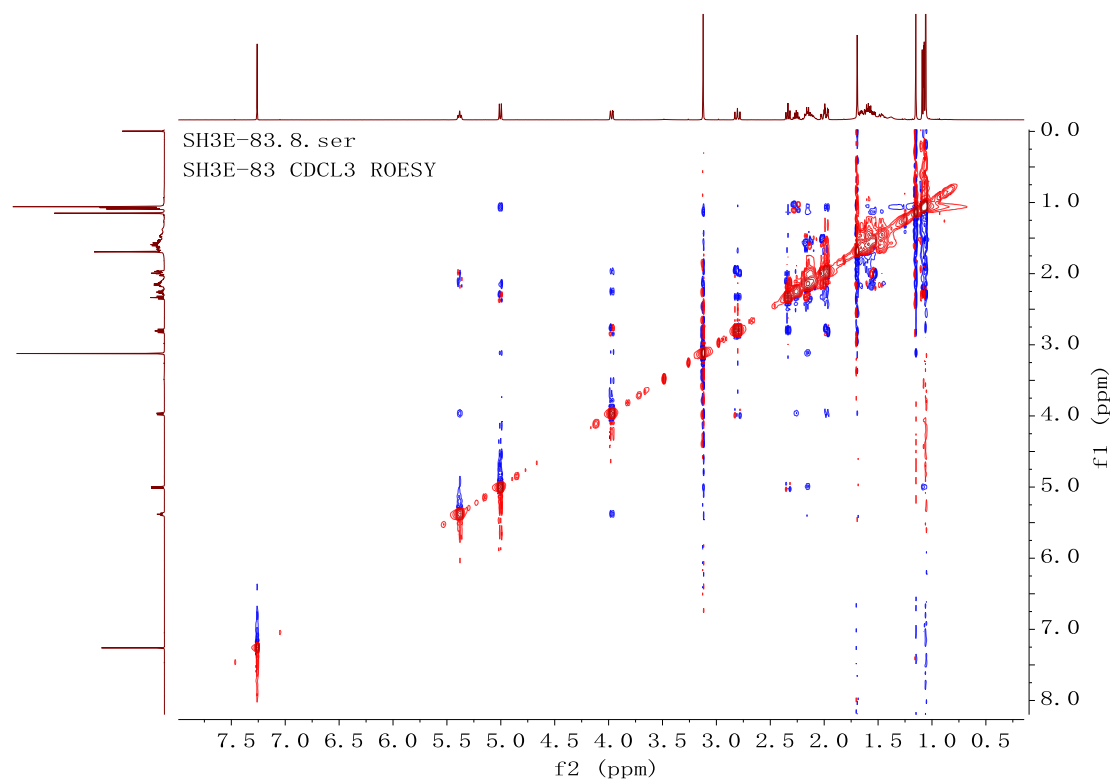

**Figure S15.** ROESY spectrum (500 MHz) of compound **2** in  $\text{CDCl}_3$

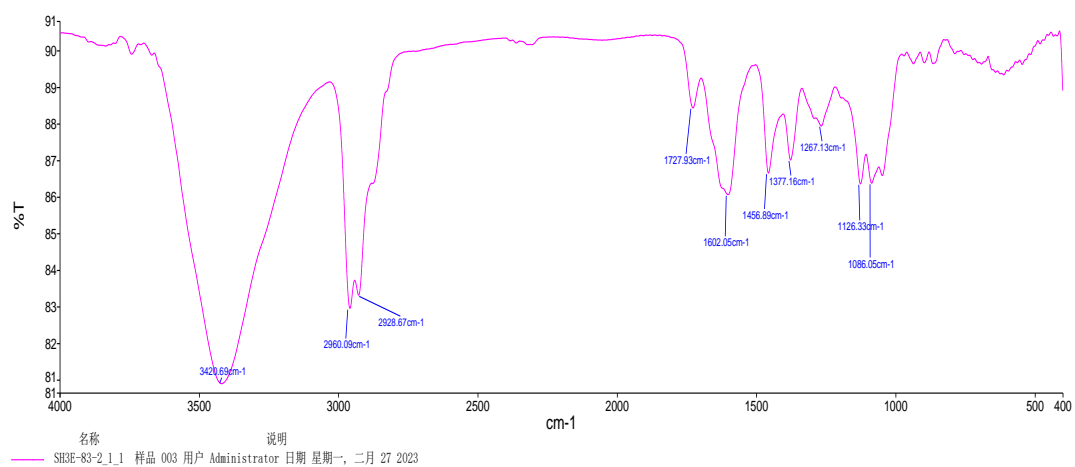

**Figure S16.** IR spectrum of compound **2**

## Mass Spectrum SmartFormula Report

### Analysis Info

Analysis Name D:\2023\A501\WYL\20230106\B502-SH3E-83\_BE1\_01\_6439.d Acquisition Date 2023-01-06 17:12:43  
Method lc-ms\_as\_ms-0.5MIN-20221111.m Operator Demo User  
Sample Name B502-SH3E-83 Instrument compact 8255754.20156  
Comment

### Acquisition Parameter

|             |            |                      |          |                  |           |
|-------------|------------|----------------------|----------|------------------|-----------|
| Source Type | ESI        | Ion Polarity         | Positive | Set Nebulizer    | 1.8 Bar   |
| Focus       | Not active | Set Capillary        | 3500 V   | Set Dry Heater   | 220 °C    |
| Scan Begin  | 50 m/z     | Set End Plate Offset | -500 V   | Set Dry Gas      | 4.0 l/min |
| Scan End    | 2500 m/z   | Set Charging Voltage | 2000 V   | Set Divert Valve | Waste     |
|             |            | Set Corona           | 0 nA     | Set APCI Heater  | 0 °C      |

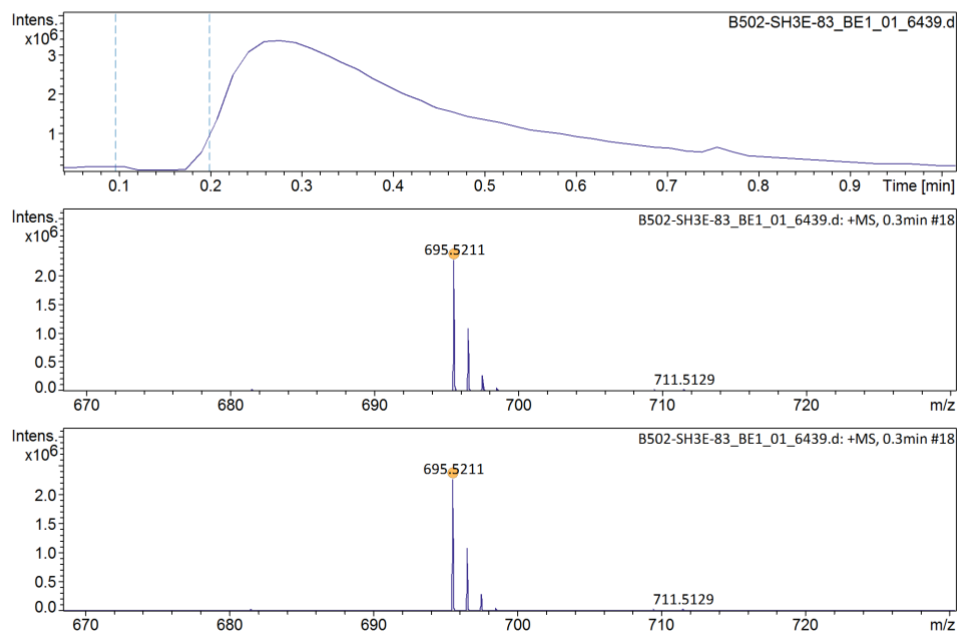

| Meas. m/z | # | Ion Formula | m/z      | err [ppm] | mSigma | # mSigma | Score  | rdb | e <sup>-</sup> Conf | N-Rule | Adduct |
|-----------|---|-------------|----------|-----------|--------|----------|--------|-----|---------------------|--------|--------|
| 695.5211  | 1 | C42H72NaO6  | 695.5221 | 1.5       | 6.1    | 1        | 100.00 | 7.0 | even                | ok     | 2M+Na  |

**Figure S17.** HR-ESIMS spectrum of compound **2**

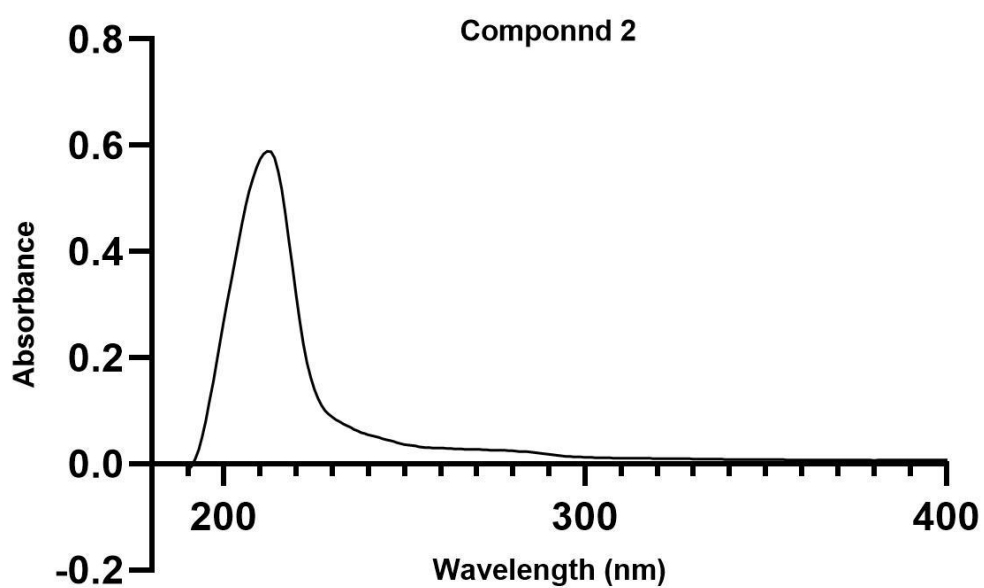

**Figure S18.** UV spectrum of compound **2**

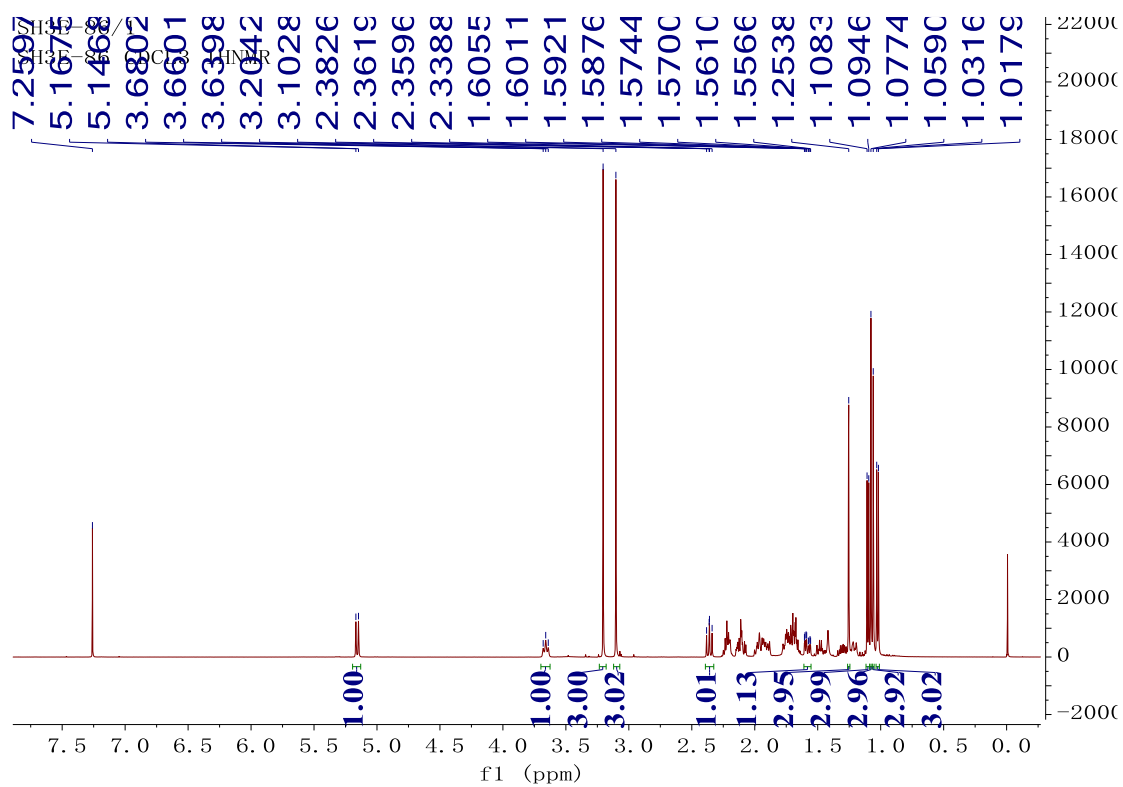

**Figure S19.**  $^1\text{H}$  NMR spectrum (500 MHz) of compound **3** in  $\text{CDCl}_3$

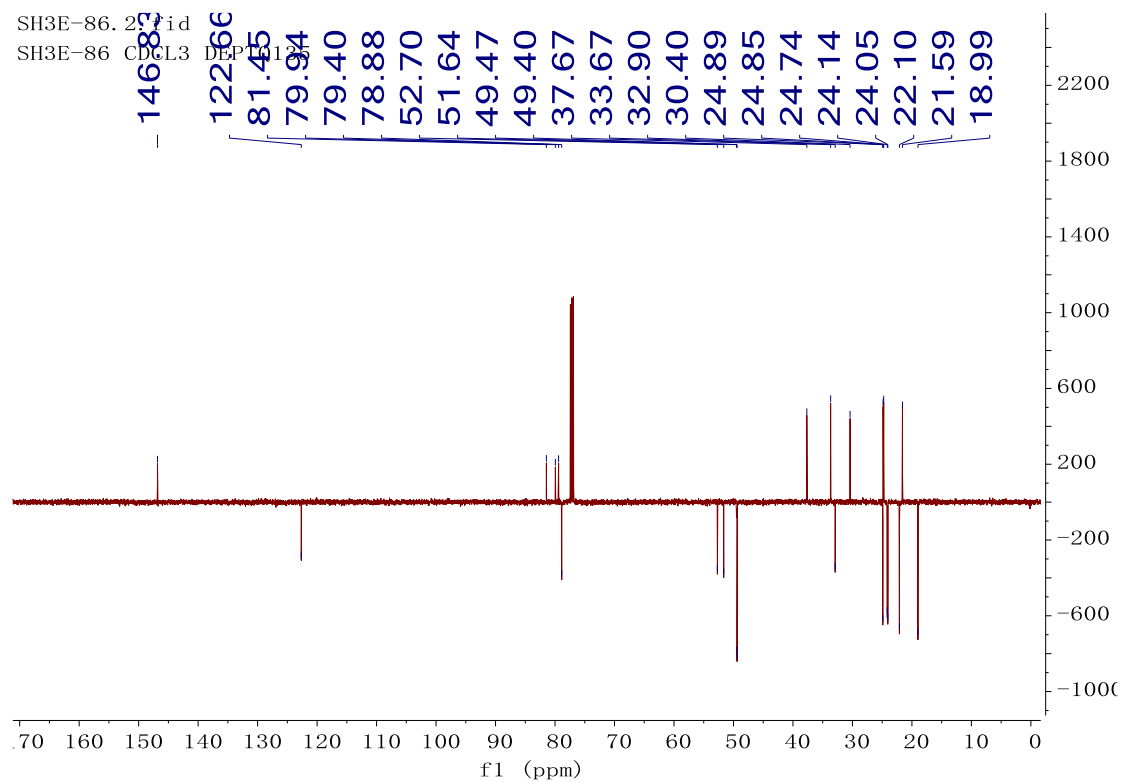

**Figure S20.**  $^{13}\text{C}$  NMR spectrum (125 MHz) of compound **3** in  $\text{CDCl}_3$

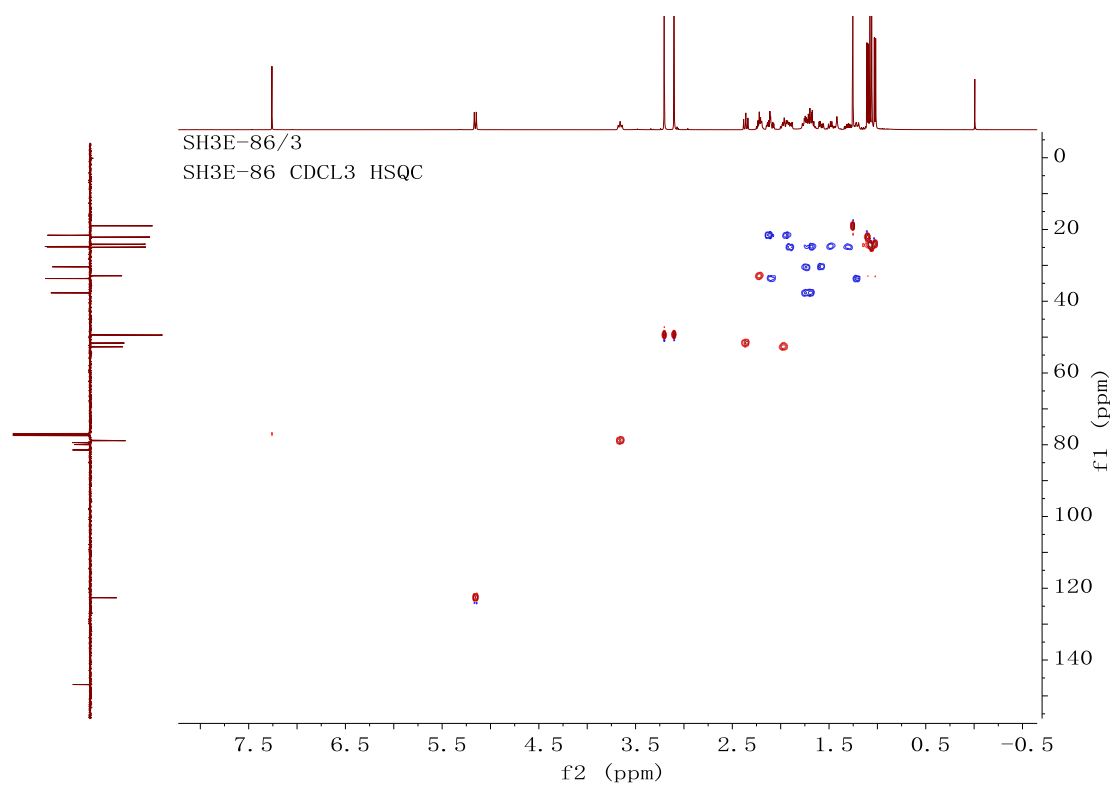

**Figure S21.** HSQC spectrum (500 MHz) of compound **3** in  $\text{CDCl}_3$

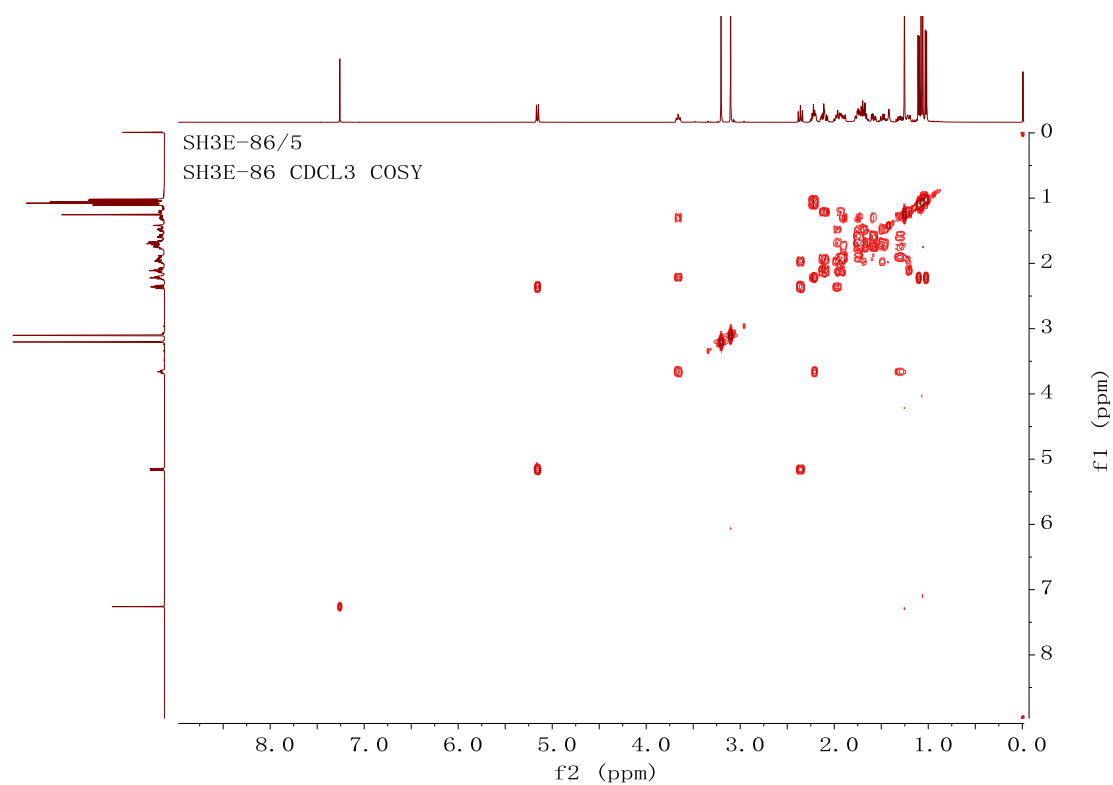

**Figure S22.** <sup>1</sup>H-<sup>1</sup>H COSY spectrum (500 MHz) of compound **3** in CDCl<sub>3</sub>

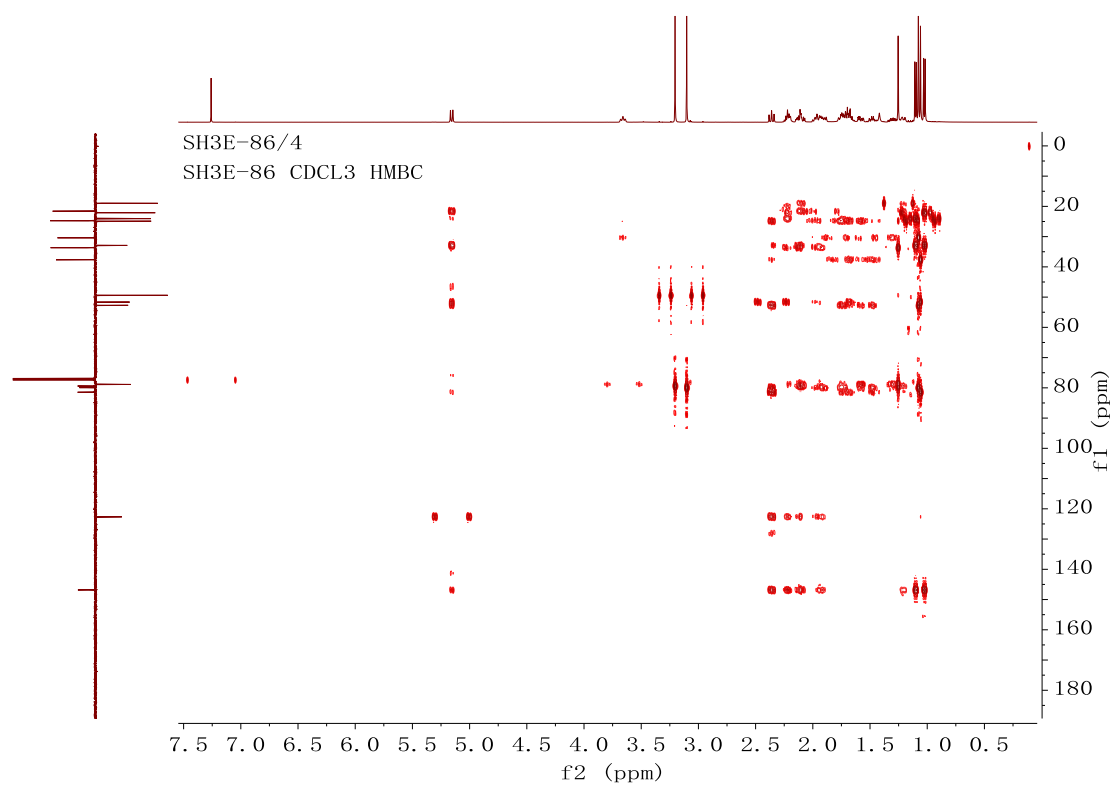

**Figure S23.** HMBC spectrum (500 MHz) of compound **3** in CDCl<sub>3</sub>

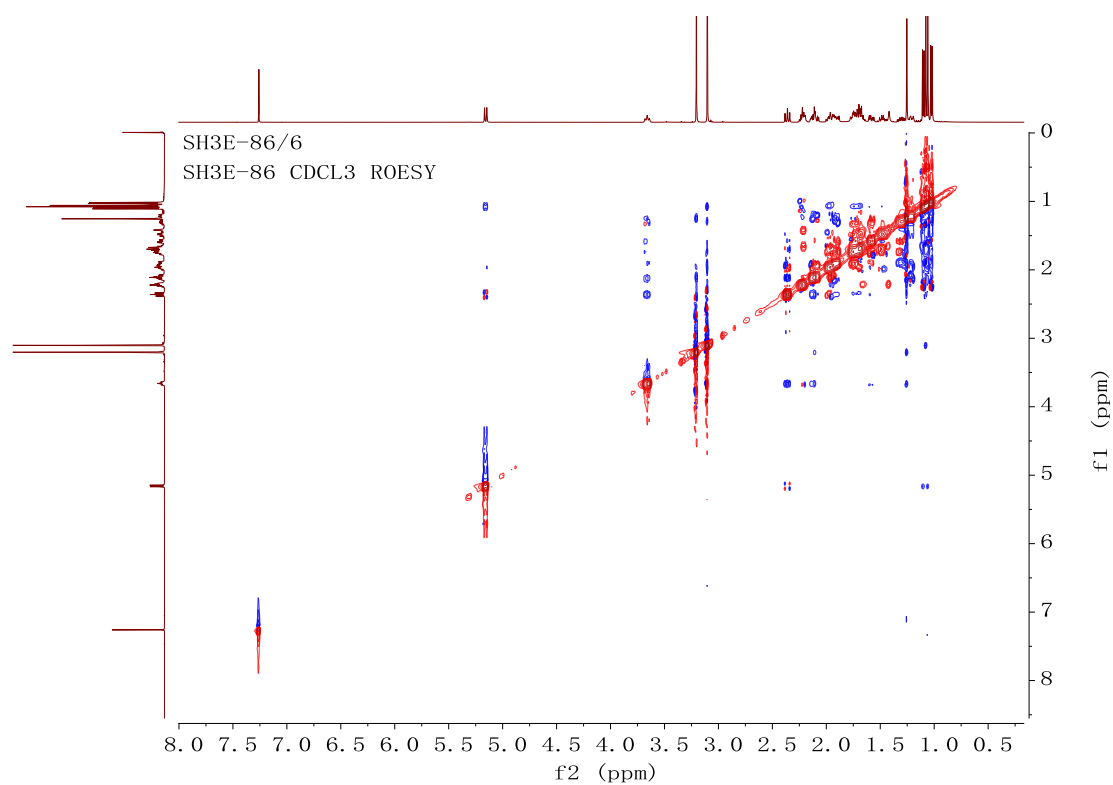

**Figure S24.** ROESY spectrum (500 MHz) of compound **3** in CDCl<sub>3</sub>

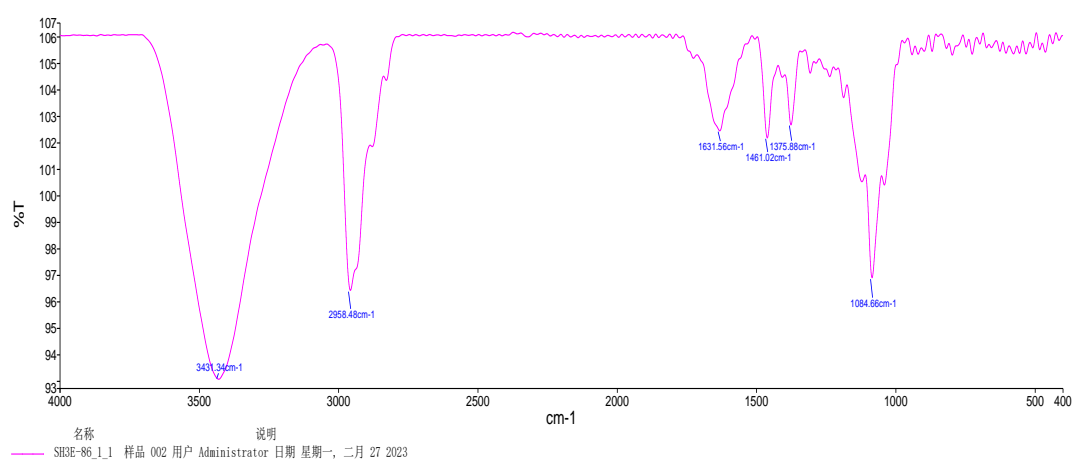

**Figure S25.** IR spectrum of compound **3**

## Mass Spectrum SmartFormula Report

### Analysis Info

Analysis Name D:\2023\B502\20230517\SH3E-86\_BA2\_01\_7483.d  
 Method lc-ms\_as\_ms-0.5MIN-20221111.m  
 Sample Name SH3E-86  
 Comment

Acquisition Date 2023-05-17 09:19:50

Operator Demo User  
 Instrument compact 8255754.20156

### Acquisition Parameter

|             |            |                      |          |                  |           |
|-------------|------------|----------------------|----------|------------------|-----------|
| Source Type | ESI        | Ion Polarity         | Positive | Set Nebulizer    | 1.8 Bar   |
| Focus       | Not active | Set Capillary        | 3500 V   | Set Dry Heater   | 220 °C    |
| Scan Begin  | 50 m/z     | Set End Plate Offset | -500 V   | Set Dry Gas      | 4.0 l/min |
| Scan End    | 2500 m/z   | Set Charging Voltage | 2000 V   | Set Divert Valve | Waste     |
|             |            | Set Corona           | 0 nA     | Set APCI Heater  | 0 °C      |

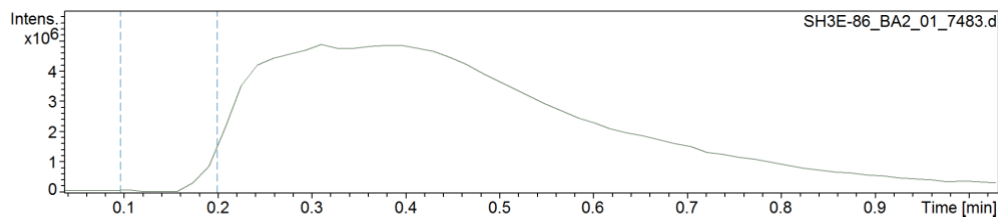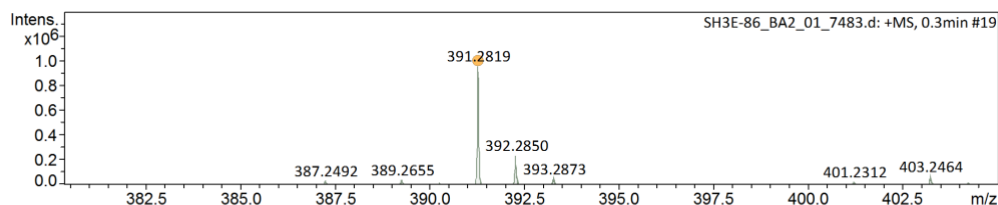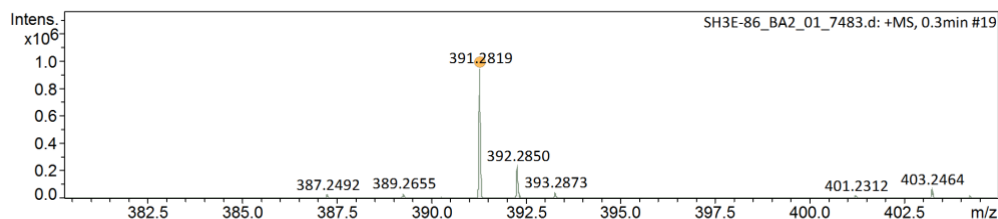

| Meas. m/z | # | Ion Formula | m/z      | err [ppm] | mSigma | # mSigma | Score  | rdb | e <sup>-</sup> Conf | N-Rule | Adduct |
|-----------|---|-------------|----------|-----------|--------|----------|--------|-----|---------------------|--------|--------|
| 391.2819  | 1 | C22H40NaO4  | 391.2819 | -0.2      | 3.1    | 1        | 100.00 | 3.0 | even                | ok     | M+Na   |

**Figure S26.** HR-ESIMS spectrum of compound **3**

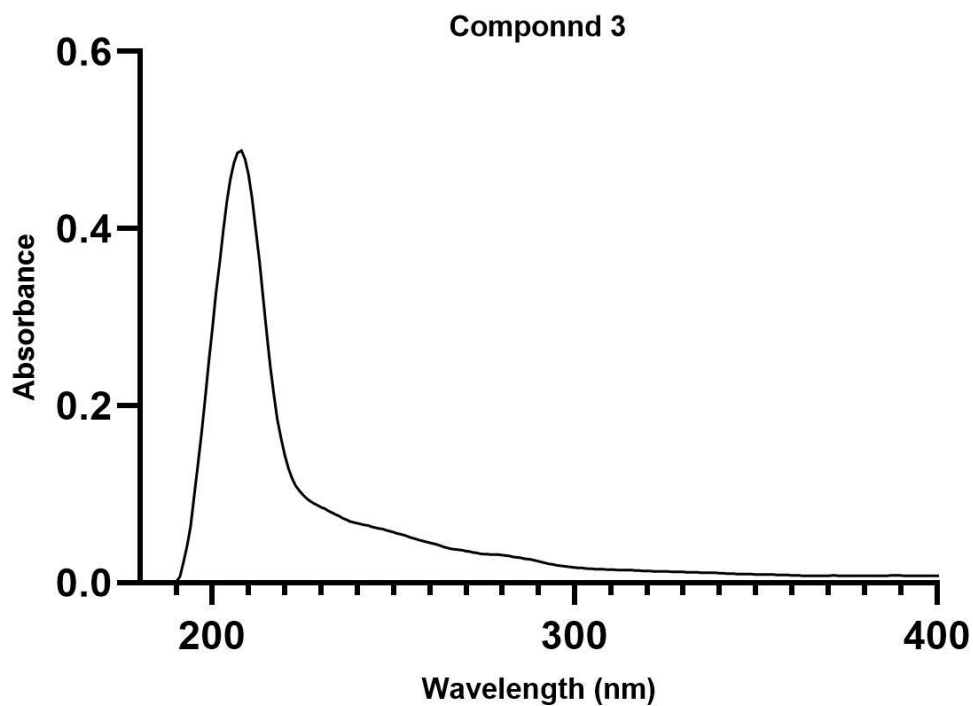

**Figure S27.** UV spectrum of compound **3**

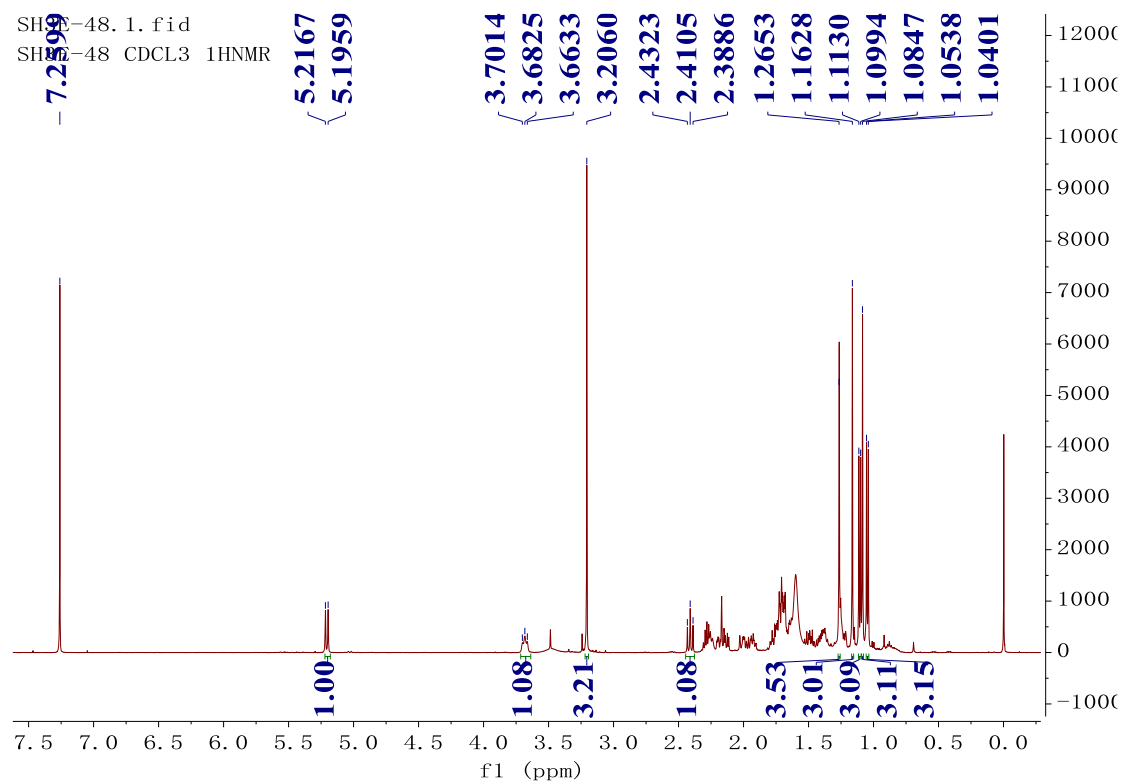

**Figure S28.** <sup>1</sup>H NMR spectrum (500 MHz) of compound **4** in CDCl<sub>3</sub>

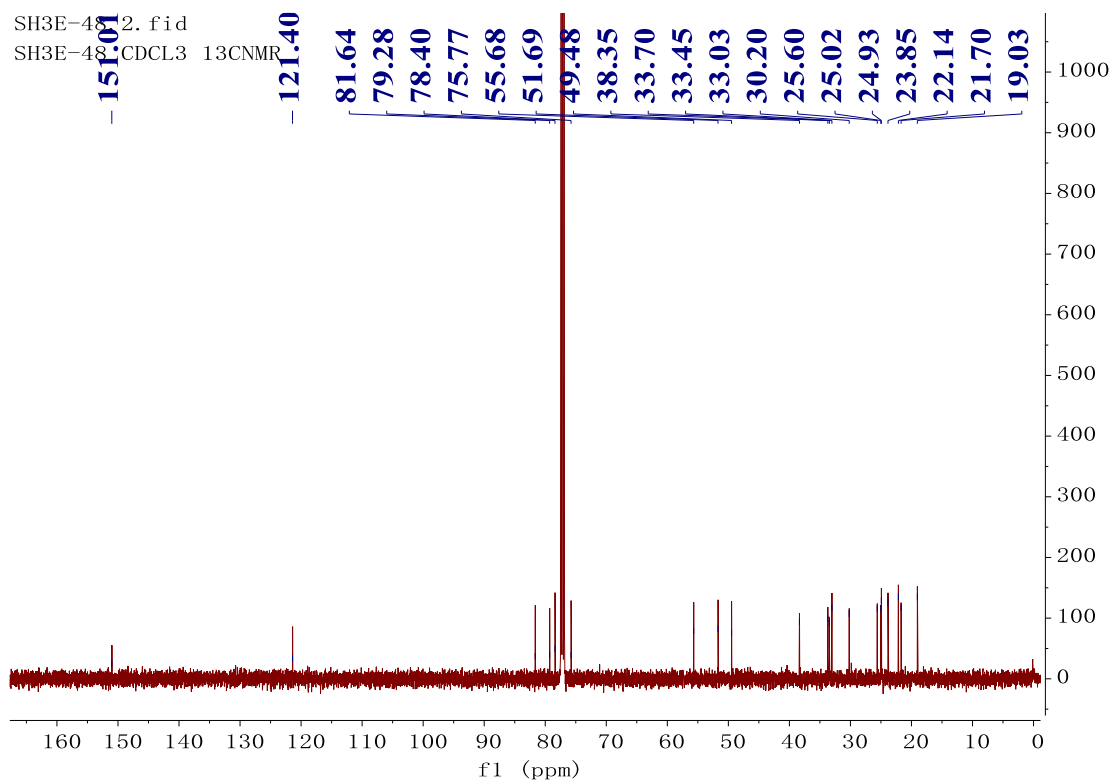

**Figure S29.**  $^{13}\text{C}$  NMR spectrum (125 MHz) of compound **4** in  $\text{CDCl}_3$

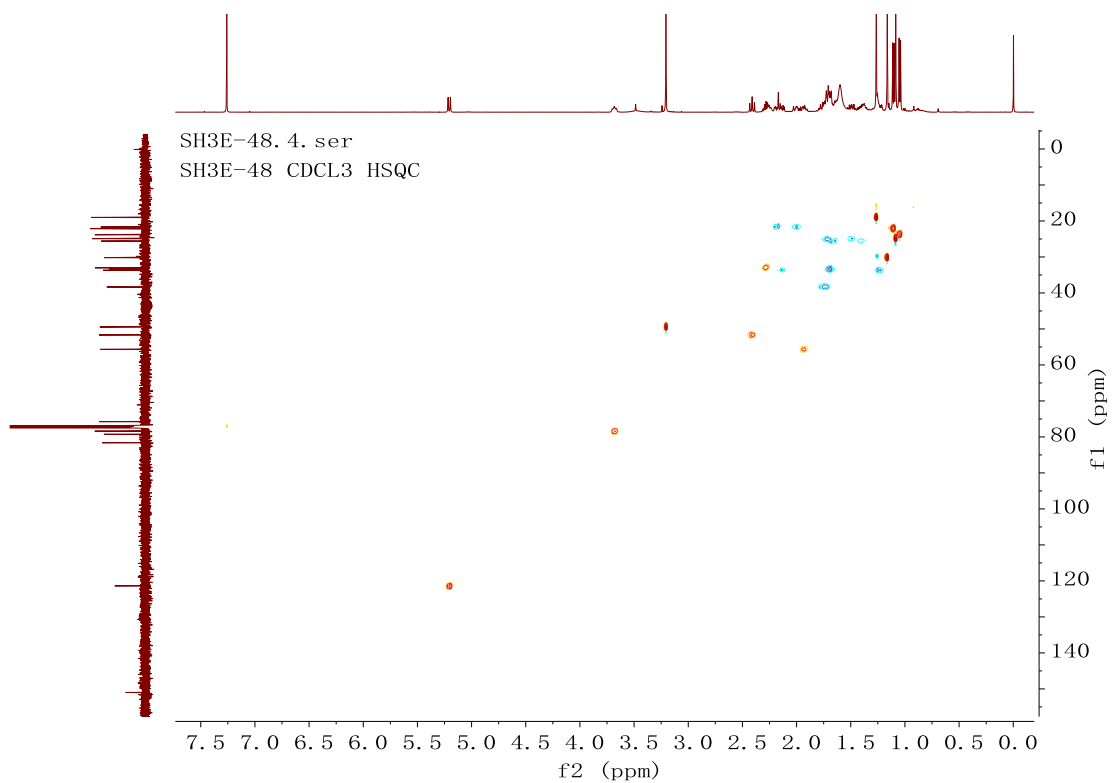

**Figure S30.** HSQC spectrum (500 MHz) of compound **4** in  $\text{CDCl}_3$

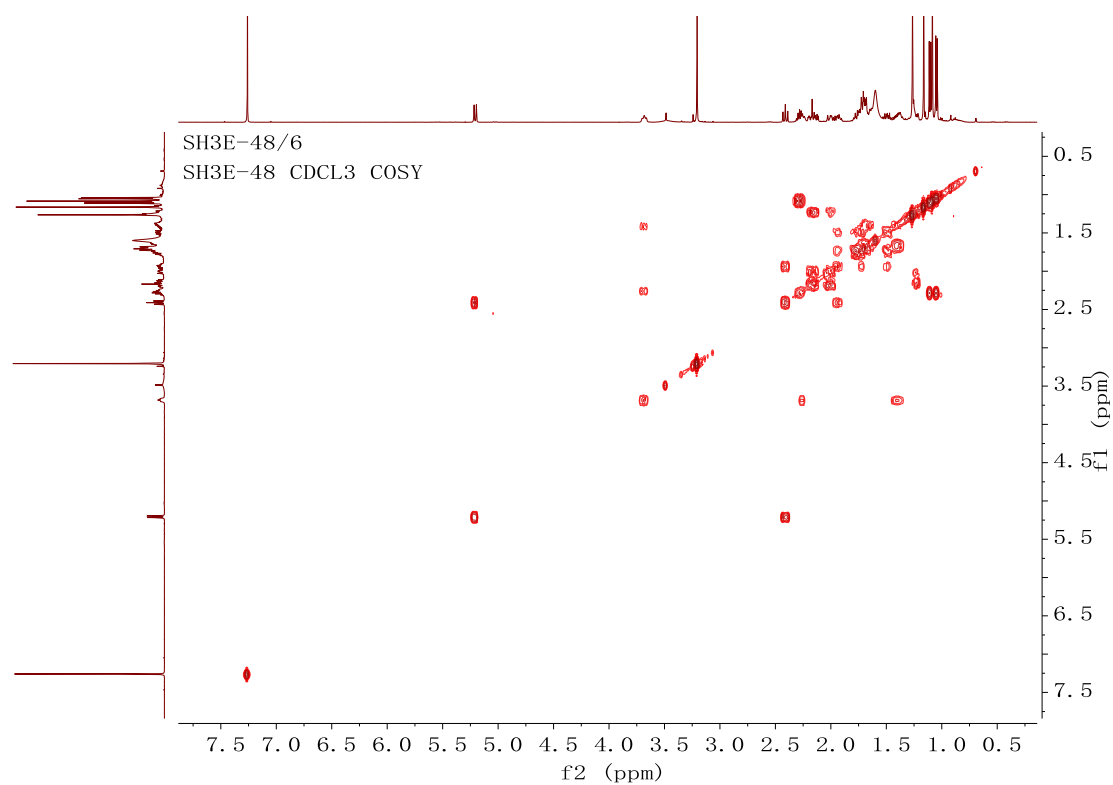

**Figure S31.**  $^1\text{H}$ - $^1\text{H}$  COSY spectrum (500 MHz) of compound **4** in  $\text{CDCl}_3$

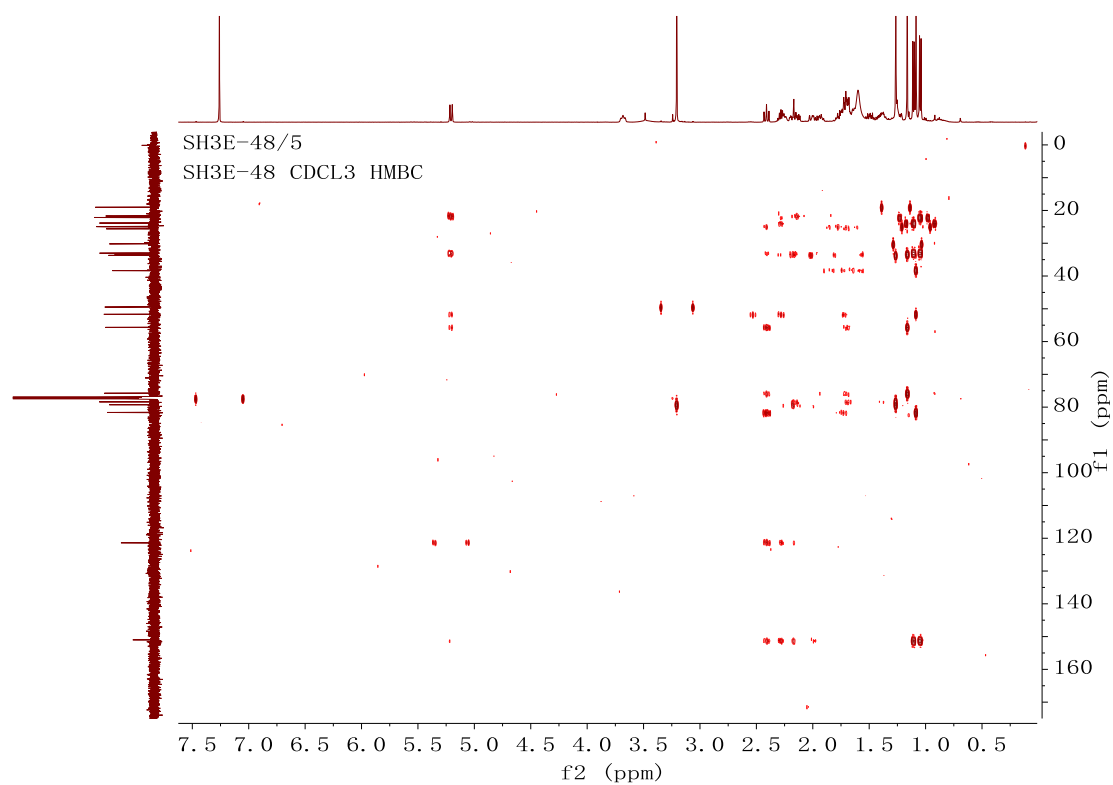

**Figure S32.** HMBC spectrum (500 MHz) of compound **4** in  $\text{CDCl}_3$

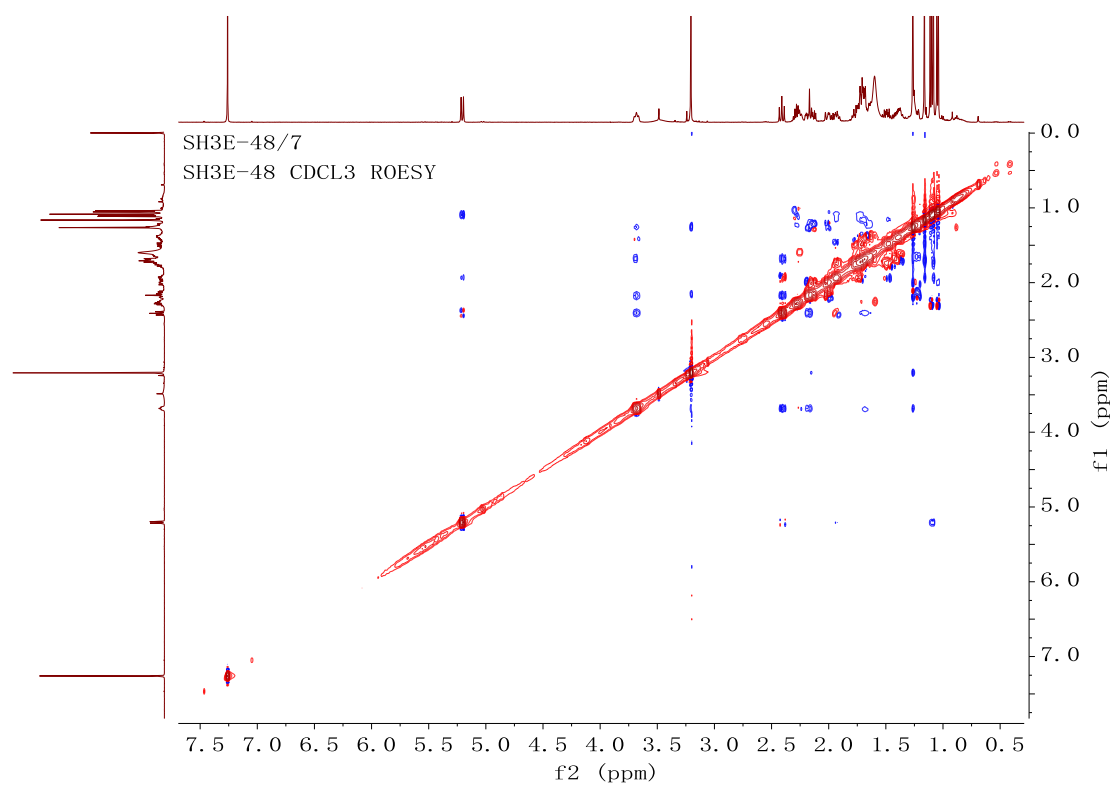

**Figure S33.** ROESY spectrum (500 MHz) of compound **4** in CDCl<sub>3</sub>

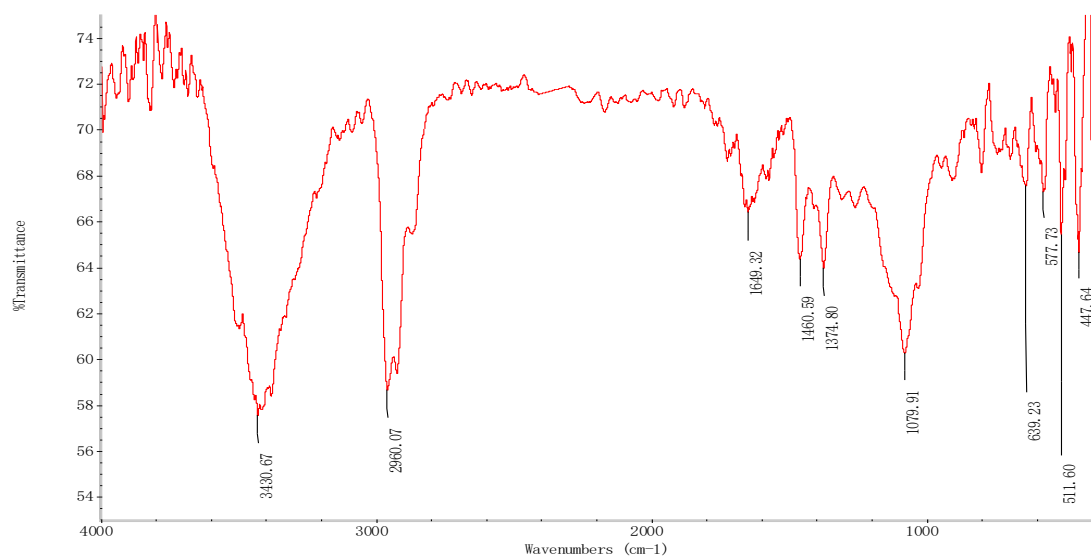

**Figure S34.** IR spectrum of compound **4**

## Mass Spectrum SmartFormula Report

### Analysis Info

Analysis Name D:\2023\B502\20230919\SH3E-48\_BB3\_01\_8667.d  
 Method lc-ms\_as\_ms-1min-20230519.m  
 Sample Name SH3E-48  
 Comment

Acquisition Date 2023-09-19 09:26:14

Operator Demo User  
 Instrument compact 8255754.20156

### Acquisition Parameter

|             |            |                      |          |                  |           |
|-------------|------------|----------------------|----------|------------------|-----------|
| Source Type | ESI        | Ion Polarity         | Positive | Set Nebulizer    | 1.8 Bar   |
| Focus       | Not active | Set Capillary        | 3500 V   | Set Dry Heater   | 220 °C    |
| Scan Begin  | 50 m/z     | Set End Plate Offset | -500 V   | Set Dry Gas      | 4.0 l/min |
| Scan End    | 2500 m/z   | Set Charging Voltage | 2000 V   | Set Divert Valve | Waste     |
|             |            | Set Corona           | 0 nA     | Set APCI Heater  | 0 °C      |

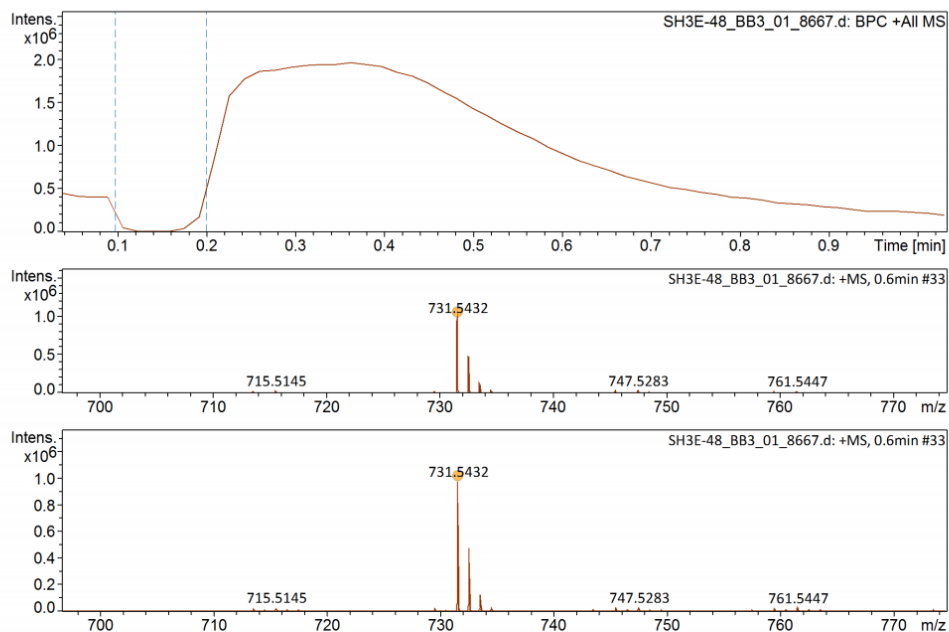

| Meas. m/z | # | Ion Formula | m/z      | err [ppm] | mSigma | # mSigma | Score  | rdB | e <sup>-</sup> Conf | N-Rule | Adduct |
|-----------|---|-------------|----------|-----------|--------|----------|--------|-----|---------------------|--------|--------|
| 731.5432  | 1 | C42H76NaO8  | 731.5432 | 0.0       | 10.4   | 2        | 100.00 | 5.0 | even                | ok     | 2M+Na  |

**Figure S35.** HR-ESIMS spectrum of compound 4

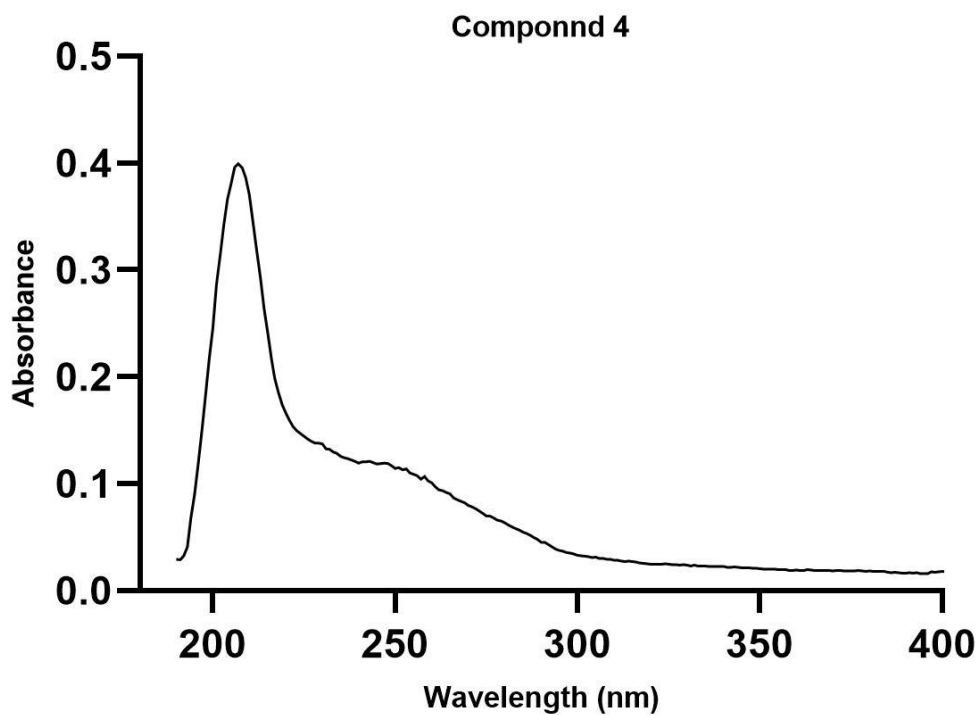

**Figure S36.** UV spectrum of compound **4**

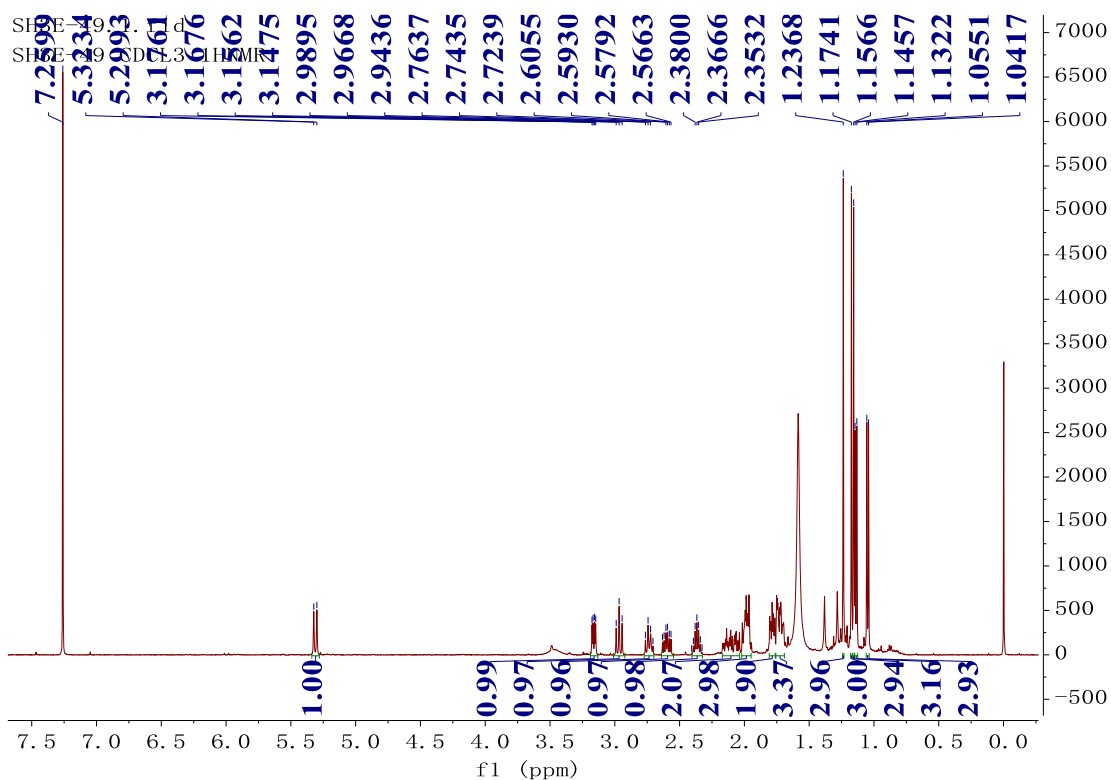

**Figure S37.** <sup>1</sup>H NMR spectrum (500 MHz) of compound **5** in CDCl<sub>3</sub>

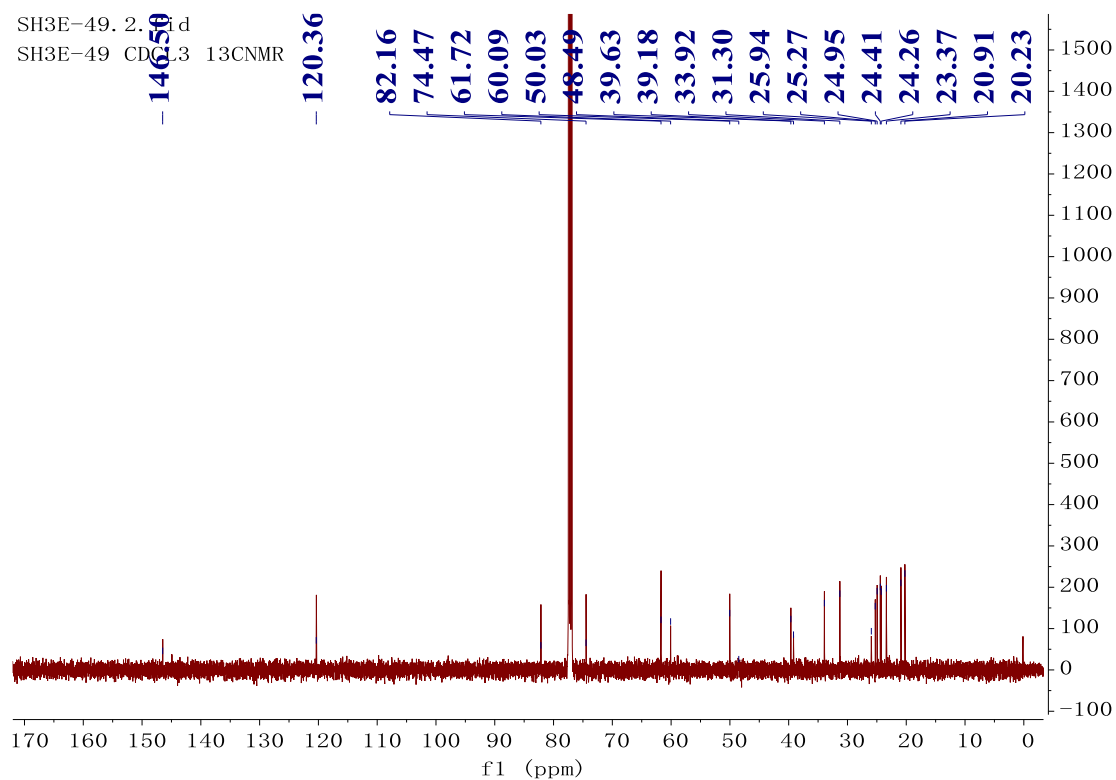

**Figure S38.** <sup>13</sup>C NMR spectrum (125 MHz) of compound **5** in CDCl<sub>3</sub>

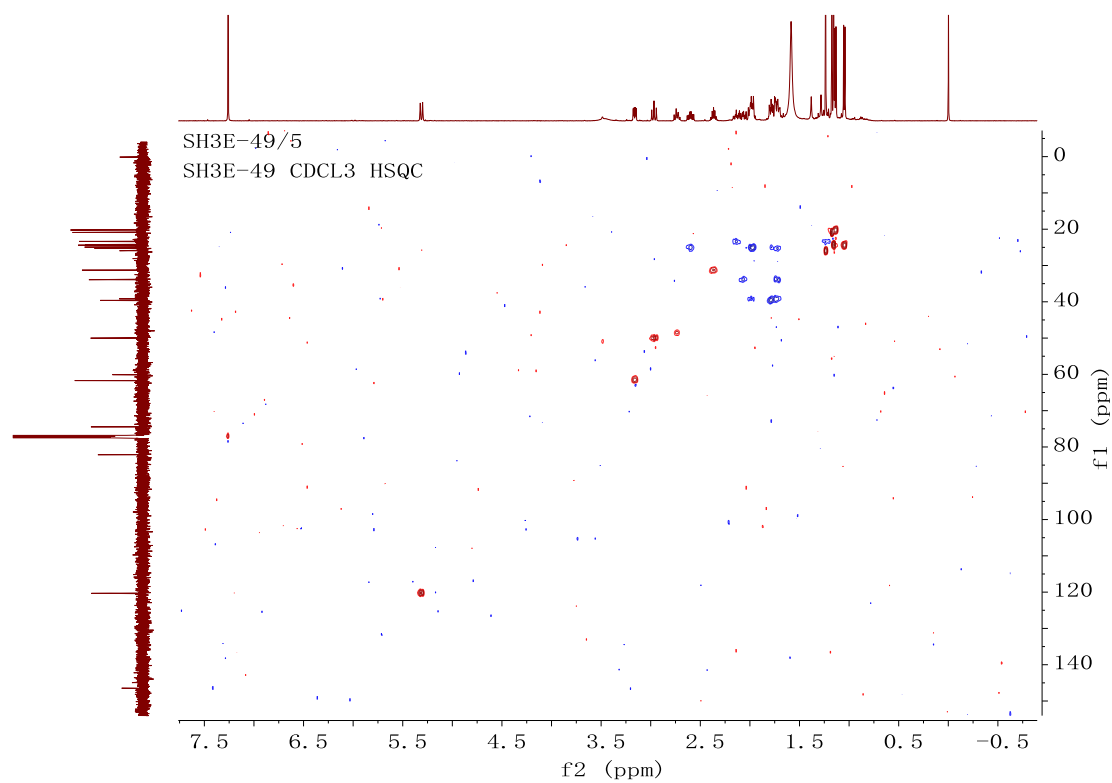

**Figure S39.** HSQC spectrum (500 MHz) of compound **5** in CDCl<sub>3</sub>

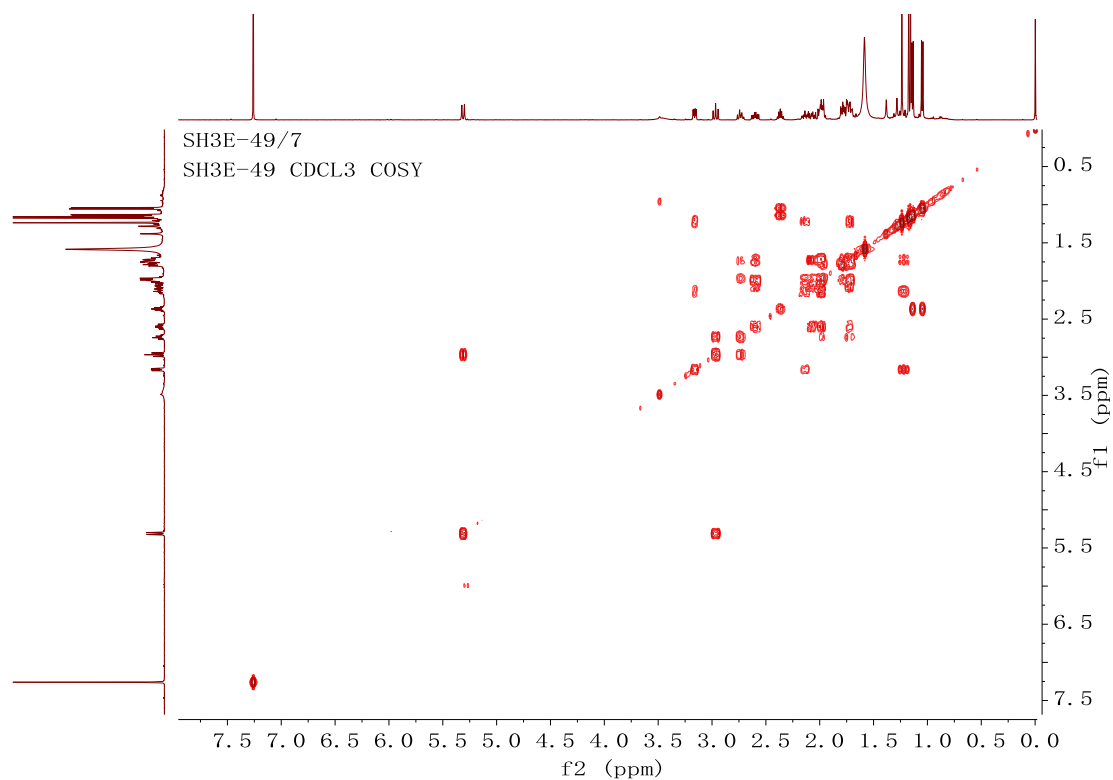

**Figure S40.**  $^1\text{H}$ - $^1\text{H}$  COSY spectrum (500 MHz) of compound **5** in  $\text{CDCl}_3$

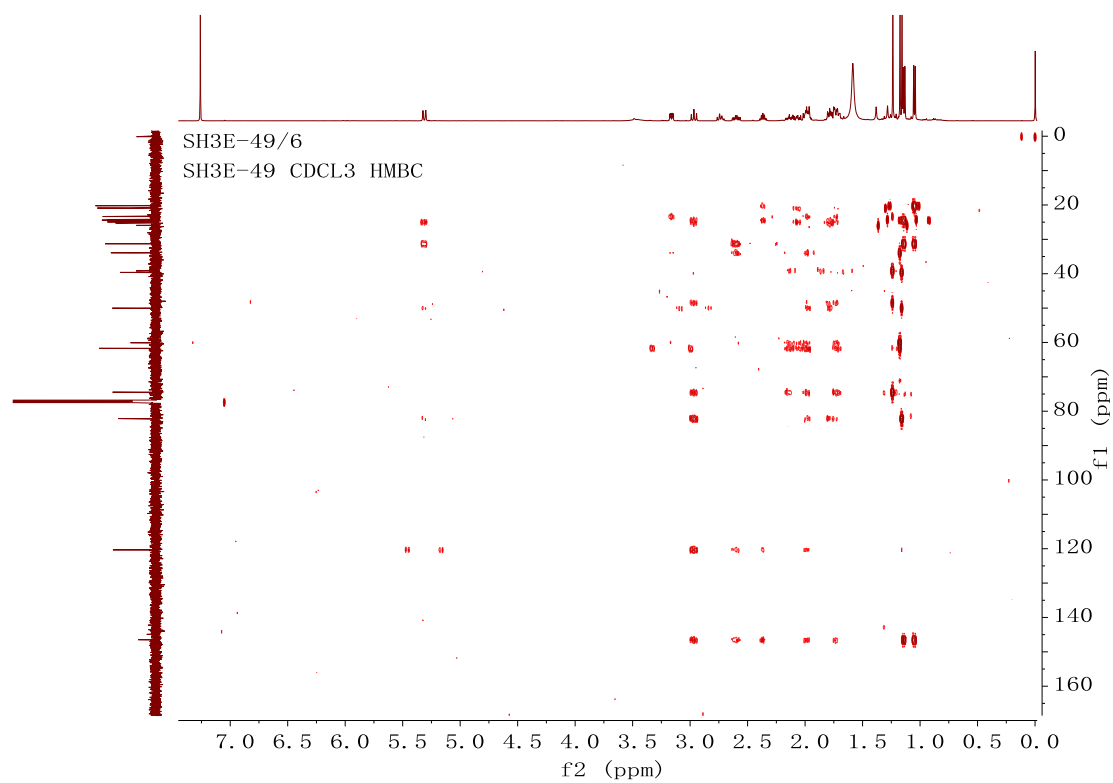

**Figure S41.** HMBC spectrum (500 MHz) of compound **5** in  $\text{CDCl}_3$

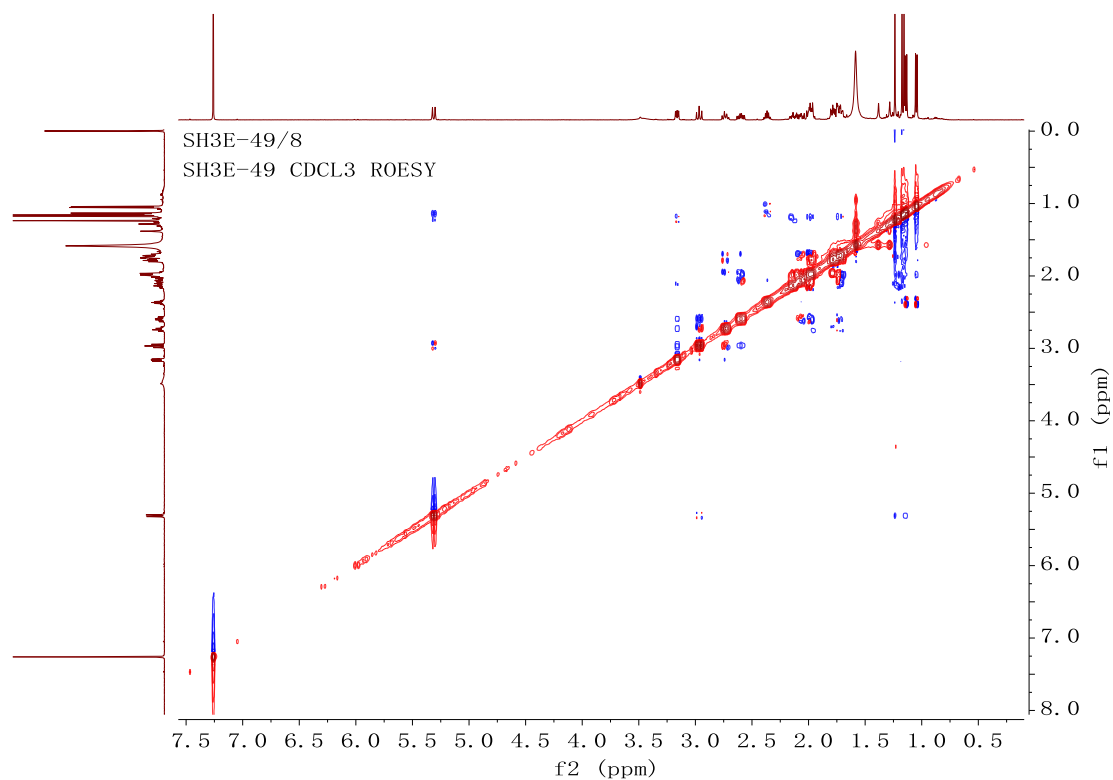

**Figure S42.** ROESY spectrum (500 MHz) of compound **5** in CDCl<sub>3</sub>

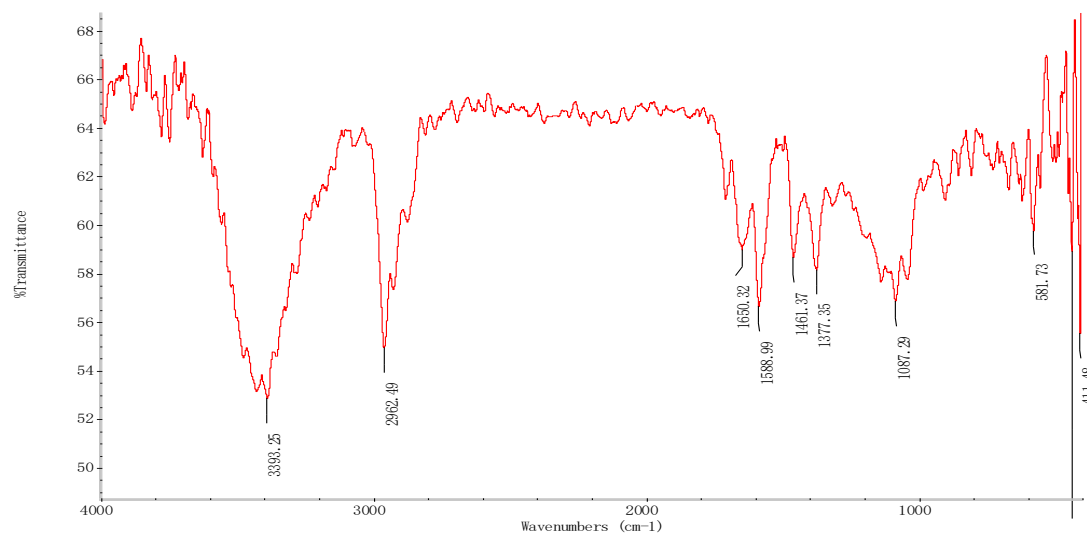

**Figure S43.** IR spectrum of compound **5**

## Mass Spectrum SmartFormula Report

### Analysis Info

|               |                                                           |
|---------------|-----------------------------------------------------------|
| Analysis Name | D:\Data\A501\WYL\2022\20221122\B502-SH3E-49_GA1_01_5680.d |
| Method        | lc-ms_as_ms-0.5MIN-20221111.m                             |
| Sample Name   | B502-SH3E-49                                              |
| Comment       |                                                           |

Acquisition Date 2022-11-22 16:38:41

Operator Demo User  
Instrument compact 8255754.20156

### Acquisition Parameter

|             |            |                      |          |                  |           |
|-------------|------------|----------------------|----------|------------------|-----------|
| Source Type | ESI        | Ion Polarity         | Positive | Set Nebulizer    | 1.8 Bar   |
| Focus       | Not active | Set Capillary        | 3500 V   | Set Dry Heater   | 220 °C    |
| Scan Begin  | 50 m/z     | Set End Plate Offset | -500 V   | Set Dry Gas      | 4.0 l/min |
| Scan End    | 2500 m/z   | Set Charging Voltage | 2000 V   | Set Divert Valve | Waste     |
|             |            | Set Corona           | 0 nA     | Set APCI Heater  | 0 °C      |

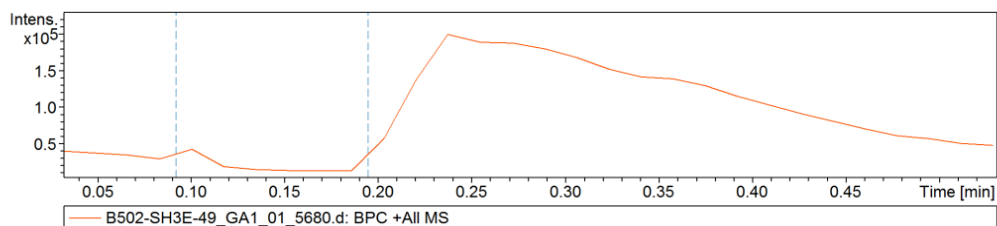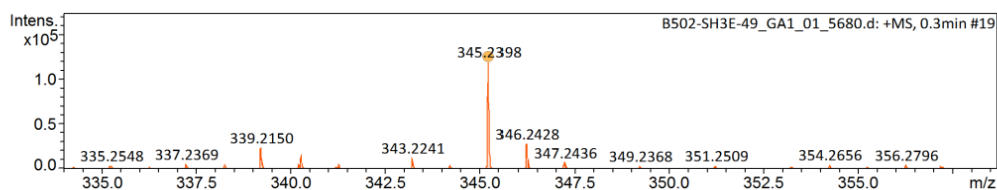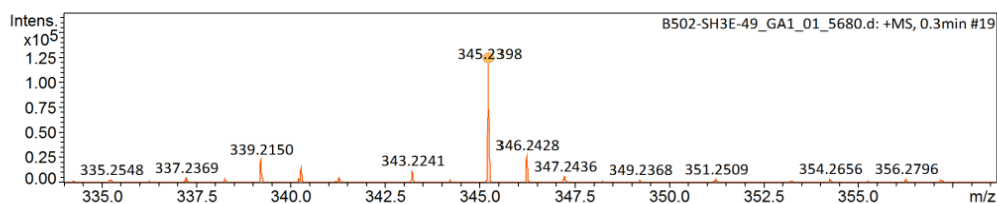

| Meas. m/z | # | Ion Formula                                      | m/z      | err [ppm] | mSigma | # mSigma | Score  | rdb | e <sup>-</sup> Conf | N-Rule | Adduct |
|-----------|---|--------------------------------------------------|----------|-----------|--------|----------|--------|-----|---------------------|--------|--------|
| 345.2398  | 1 | C <sub>20</sub> H <sub>34</sub> NaO <sub>3</sub> | 345.2400 | 0.6       | 13.9   | 1        | 100.00 | 4.0 | even                | ok     | M+Na   |

**Figure S44.** HR-ESIMS spectrum of compound **5**

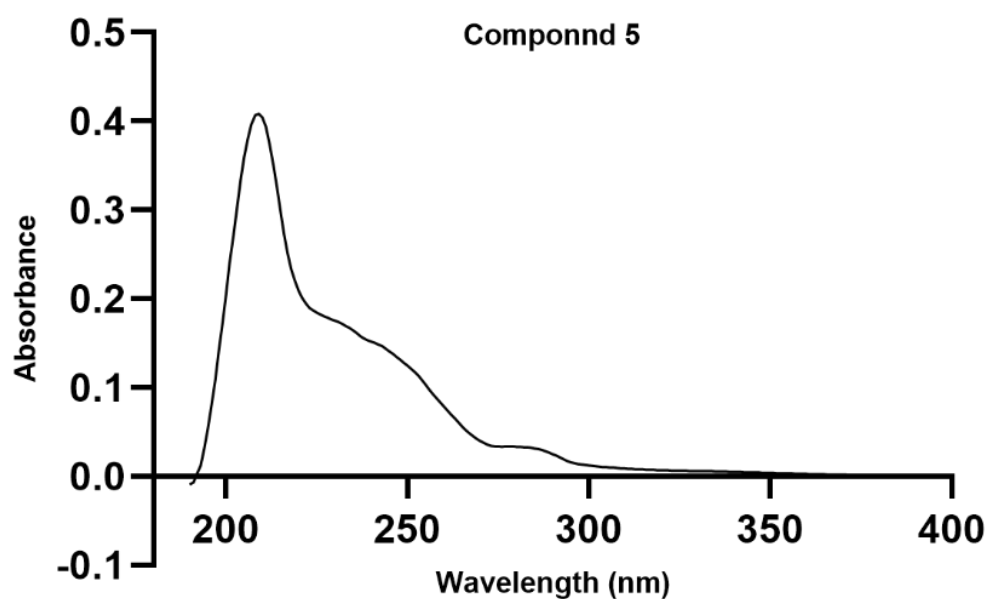

**Figure S45.** UV spectrum of compound **5**

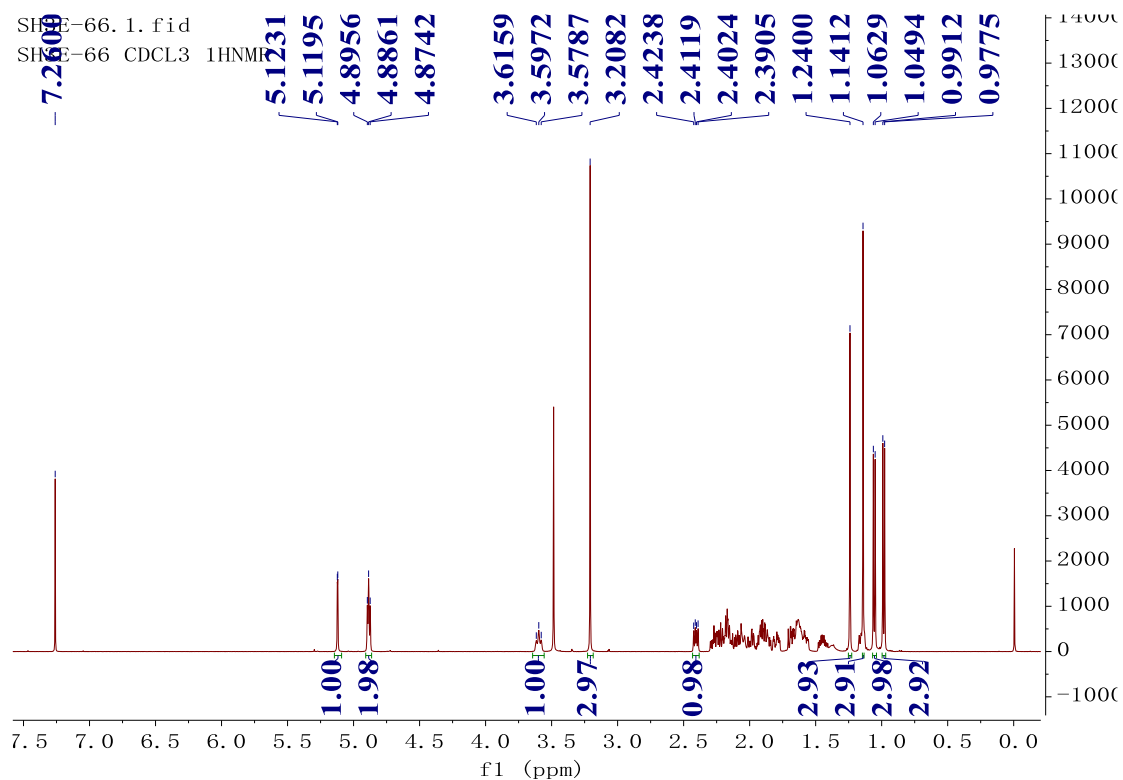

**Figure S46.** <sup>1</sup>H NMR spectrum (500 MHz) of compound **6** in CDCl<sub>3</sub>

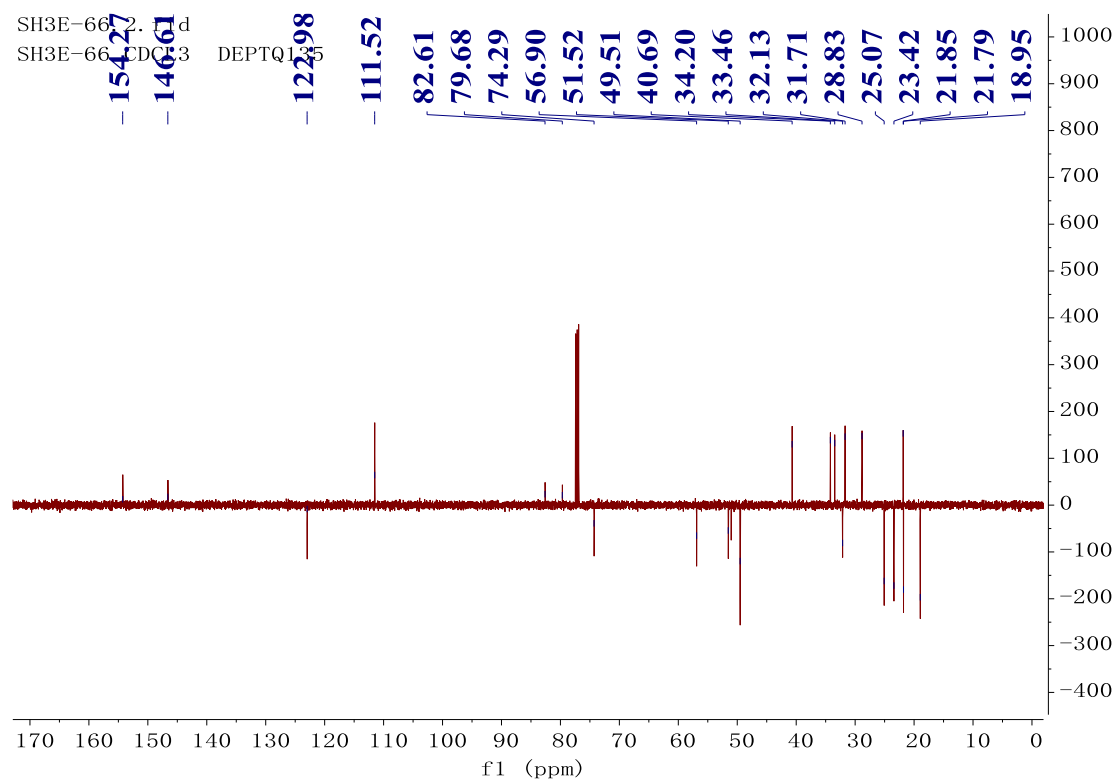

**Figure S47.**  $^{13}\text{C}$  NMR spectrum (125 MHz) of compound **6** in  $\text{CDCl}_3$

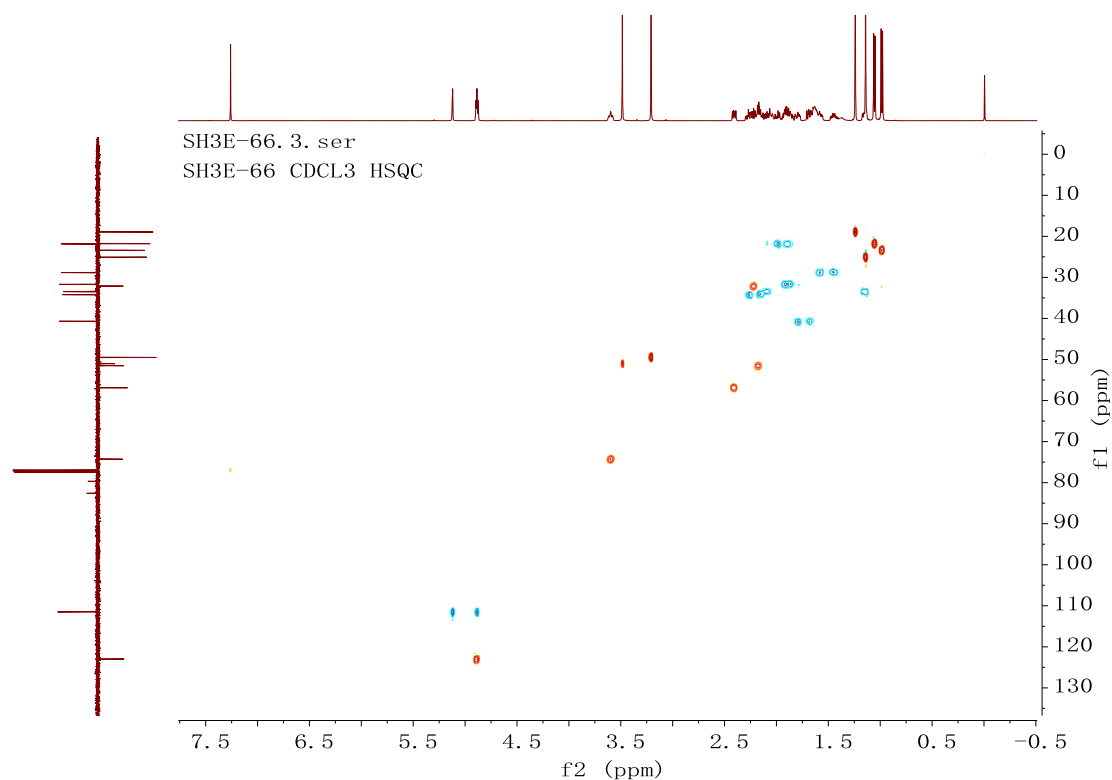

**Figure S48.** HSQC spectrum (500 MHz) of compound **6** in  $\text{CDCl}_3$

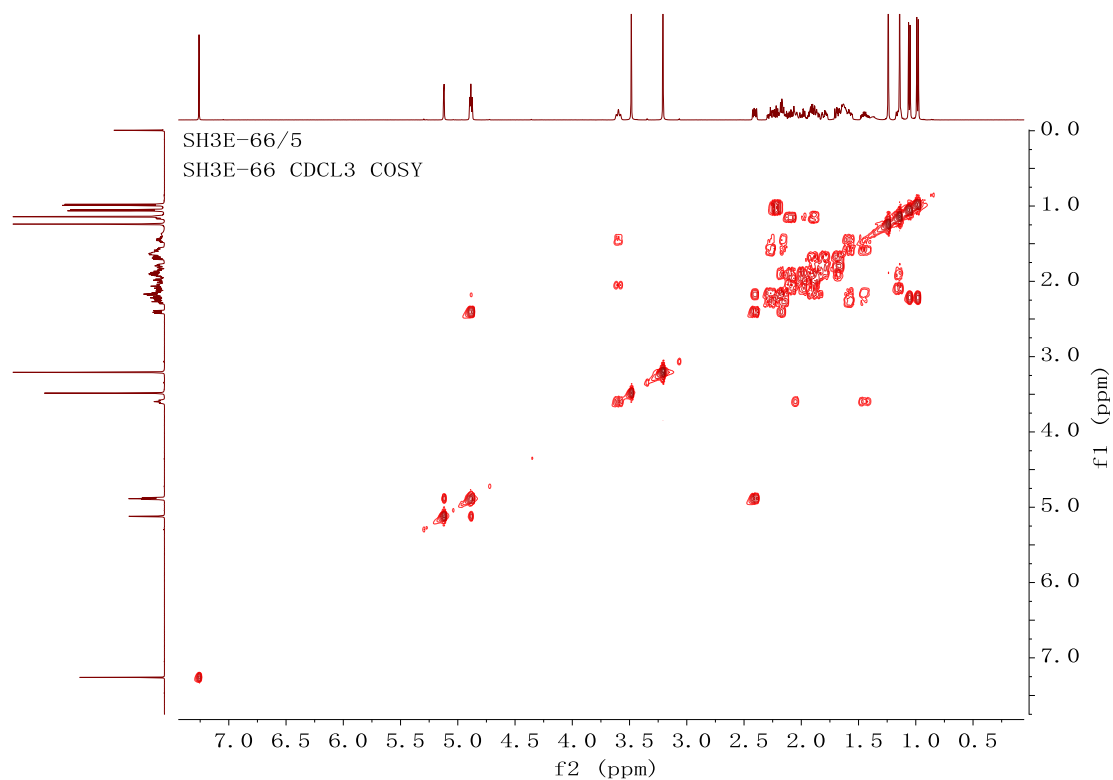

**Figure S49.**  $^1\text{H}$ - $^1\text{H}$  COSY spectrum (500 MHz) of compound **6** in  $\text{CDCl}_3$

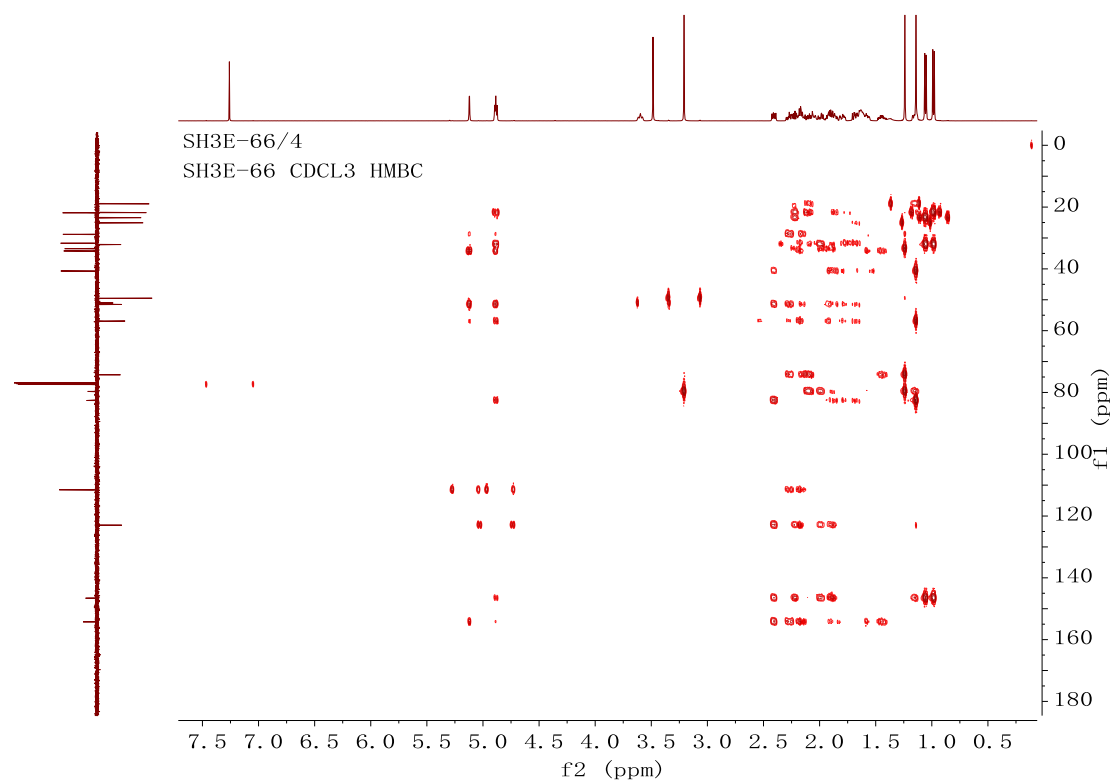

**Figure S50.** HMBC spectrum (500 MHz) of compound **6** in  $\text{CDCl}_3$

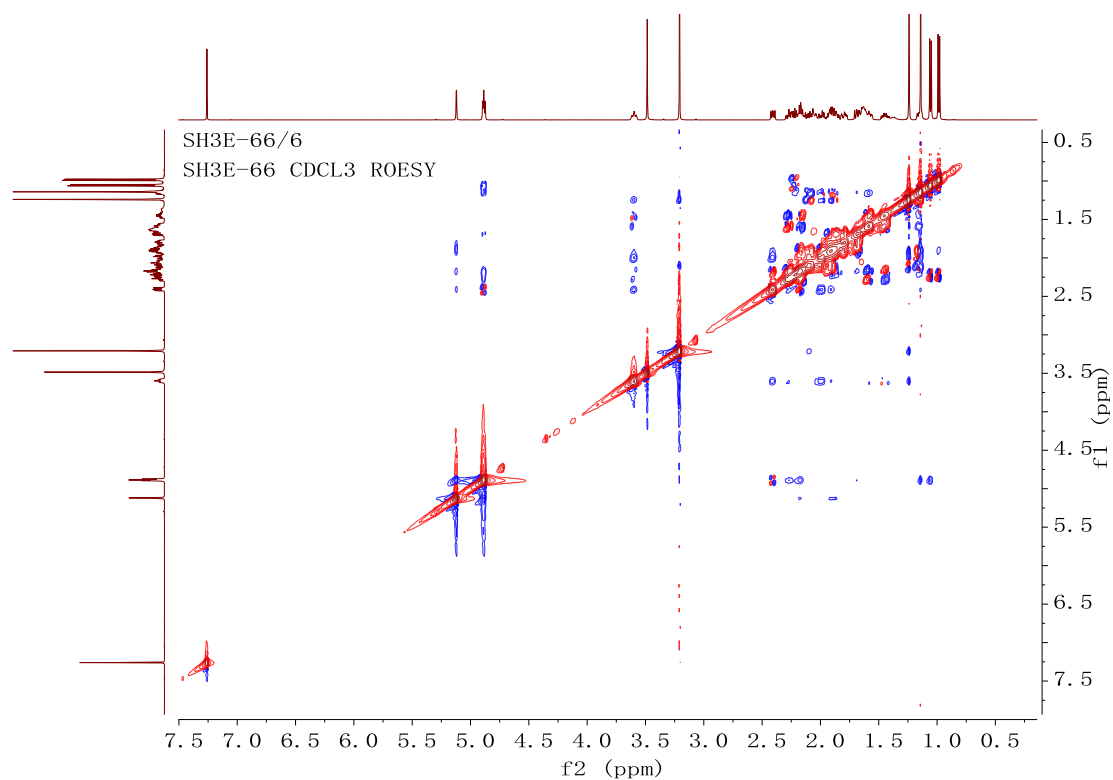

**Figure S51.** ROESY spectrum (500 MHz) of compound **6** in CDCl<sub>3</sub>

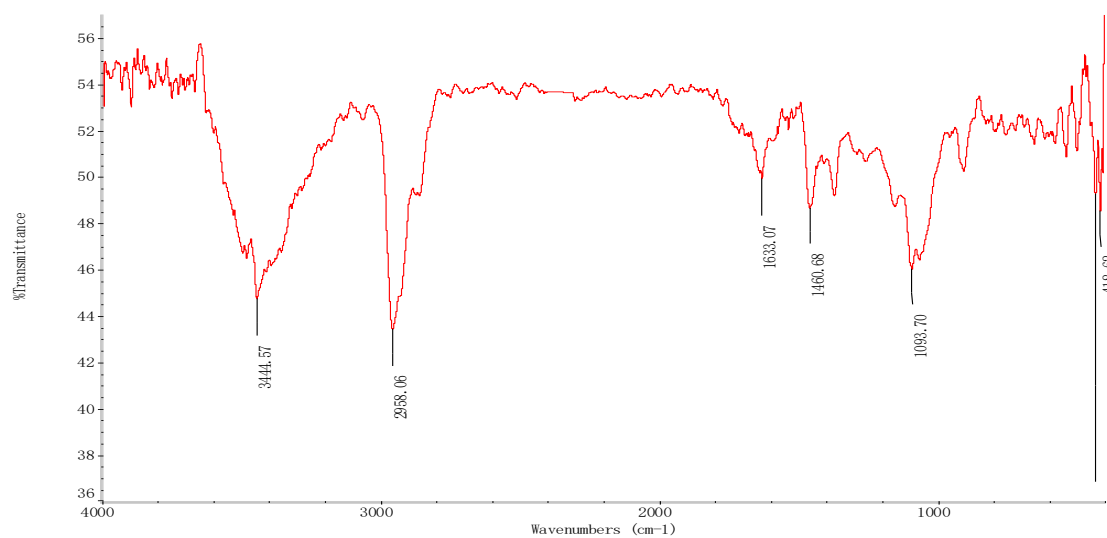

**Figure S52.** IR spectrum of compound **6**

## Mass Spectrum SmartFormula Report

### Analysis Info

|               |                                                           |
|---------------|-----------------------------------------------------------|
| Analysis Name | D:\Data\A501\WYL\2022\20221017\B502-SH3E-66_BE3_01_5119.d |
| Method        | lc-ms_as_ms-0.5MIN.m                                      |
| Sample Name   | B502-SH3E-66                                              |
| Comment       |                                                           |

Acquisition Date 2022-10-17 17:50:45

Operator Demo User

Instrument compact 8255754.20156

### Acquisition Parameter

|             |            |                      |          |
|-------------|------------|----------------------|----------|
| Source Type | ESI        | Ion Polarity         | Positive |
| Focus       | Not active | Set Capillary        | 4500 V   |
| Scan Begin  | 50 m/z     | Set End Plate Offset | -500 V   |
| Scan End    | 2500 m/z   | Set Charging Voltage | 2000 V   |
|             |            | Set Corona           | 0 nA     |

|                  |           |
|------------------|-----------|
| Set Nebulizer    | 1.8 Bar   |
| Set Dry Heater   | 220 °C    |
| Set Dry Gas      | 4.0 l/min |
| Set Divert Valve | Waste     |
| Set APCI Heater  | 0 °C      |

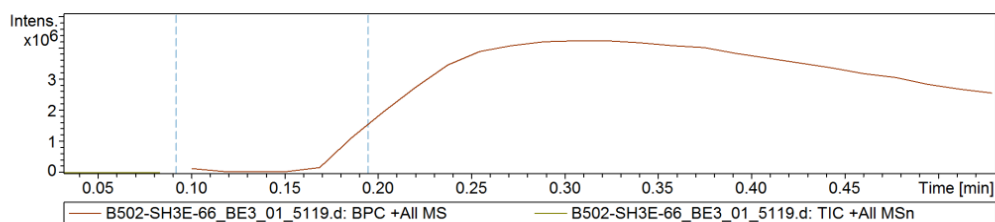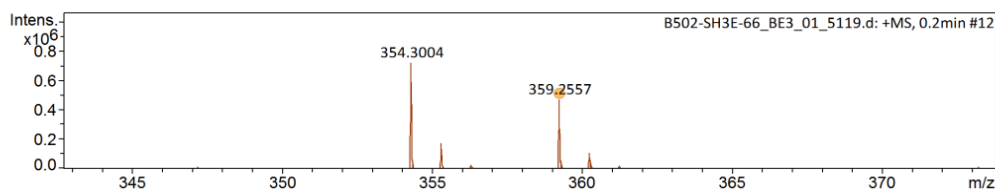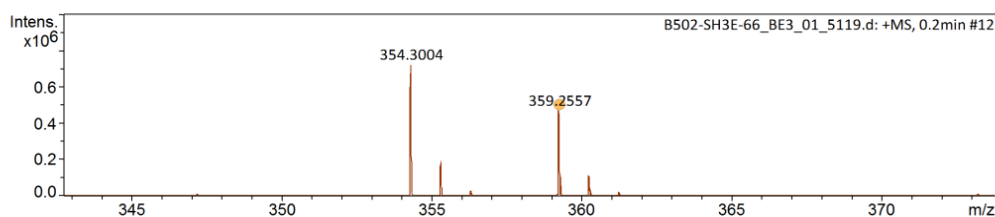

| Meas. m/z | # | Ion Formula                                      | m/z      | err [ppm] | mSigma | # mSigma | Score  | rdb | e <sup>-</sup> Conf | N-Rule | Adduct |
|-----------|---|--------------------------------------------------|----------|-----------|--------|----------|--------|-----|---------------------|--------|--------|
| 359.2557  | 1 | C <sub>21</sub> H <sub>36</sub> NaO <sub>3</sub> | 359.2557 | -0.2      | 2.6    | 1        | 100.00 | 4.0 | even                | ok     | M+Na   |

**Figure S53.** HR-ESIMS spectrum of compound **6**

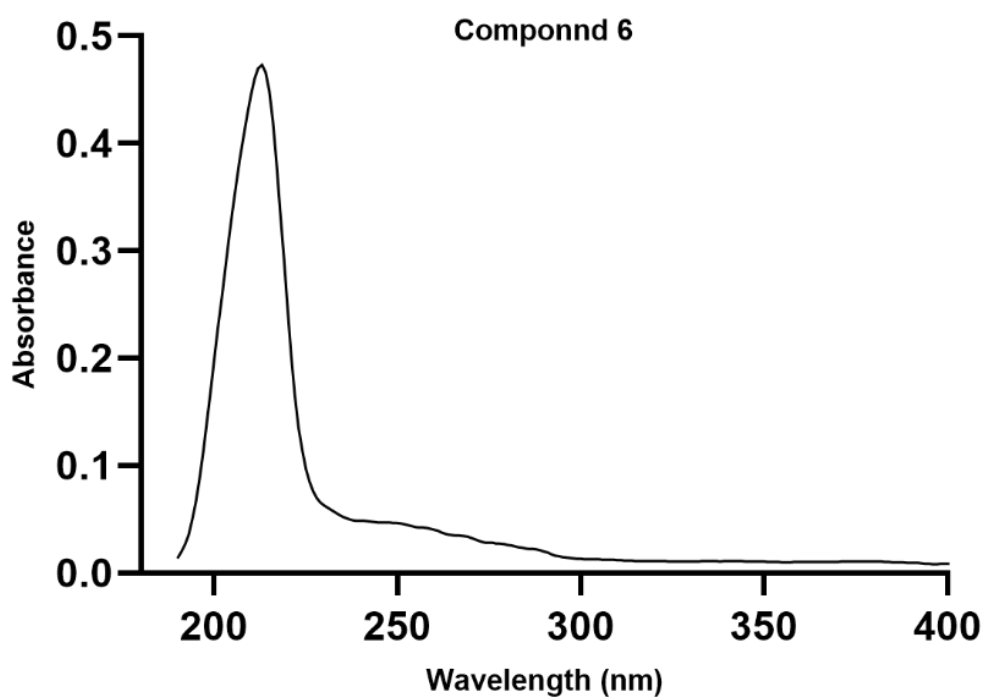

Figure S54. UV spectrum of compound 6

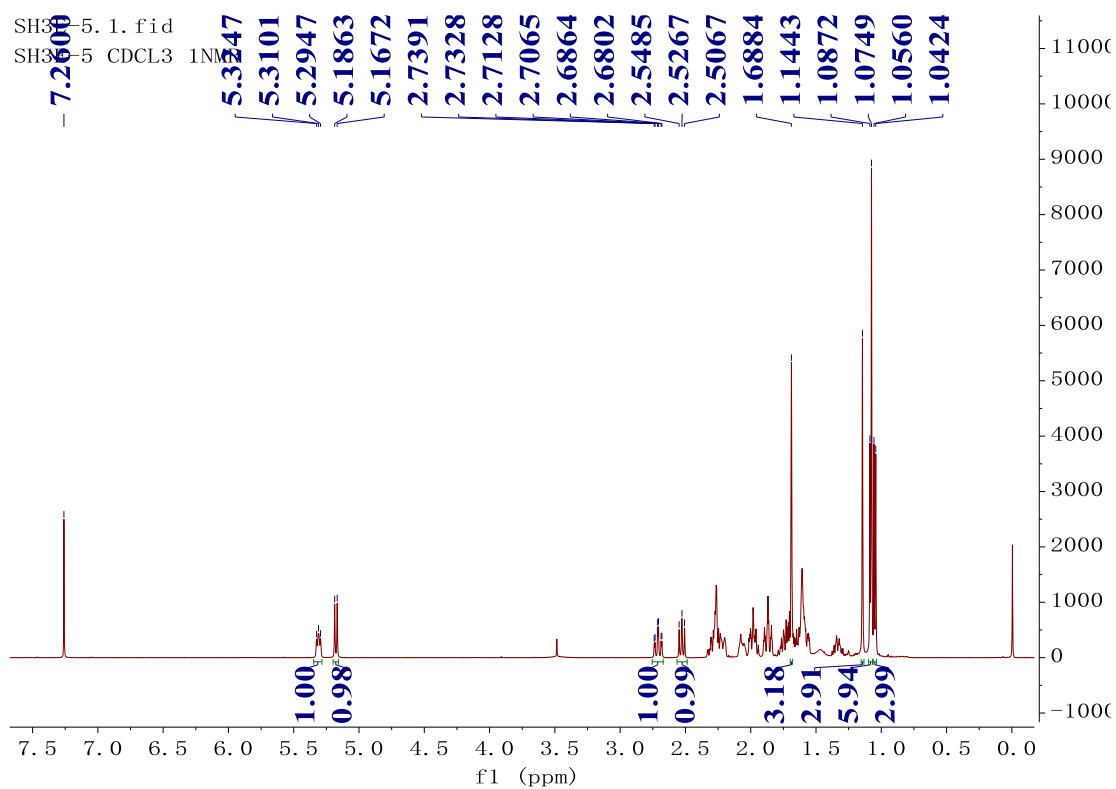

Figure S55.  $^1\text{H}$  NMR spectrum (500 MHz) of compound 7 in  $\text{CDCl}_3$

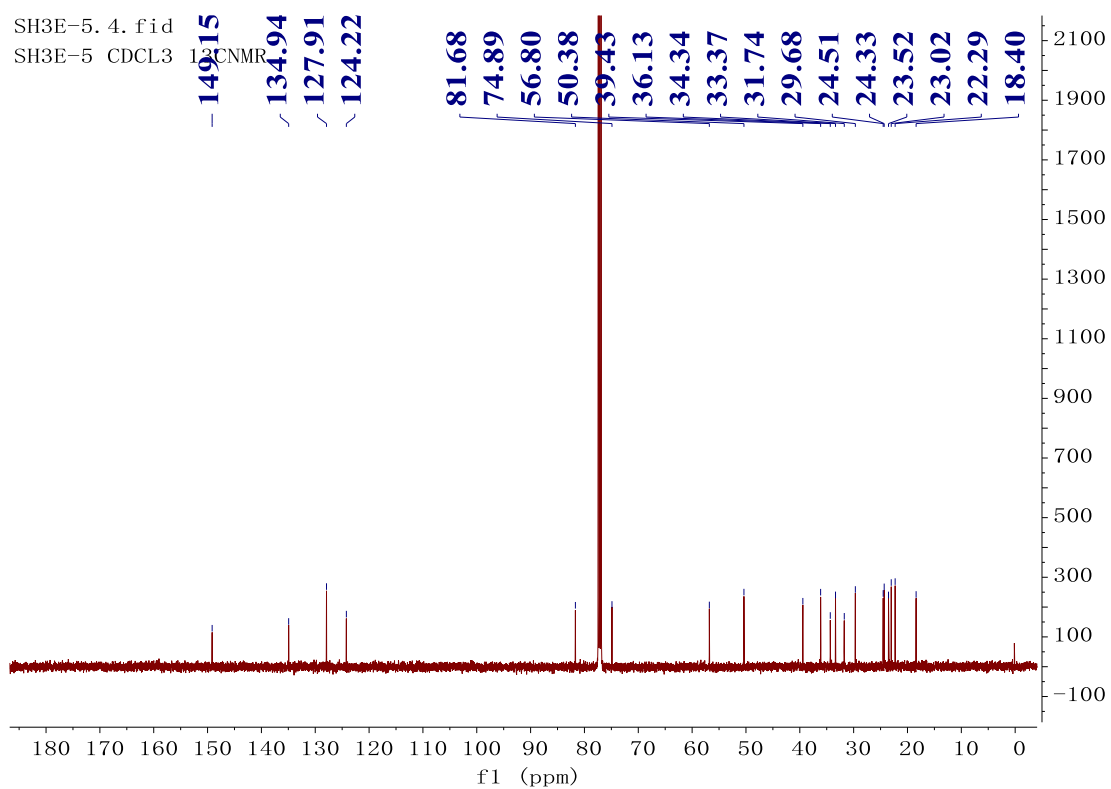

**Figure S56.** <sup>13</sup>C NMR spectrum (125 MHz) of compound **7** in CDCl<sub>3</sub>

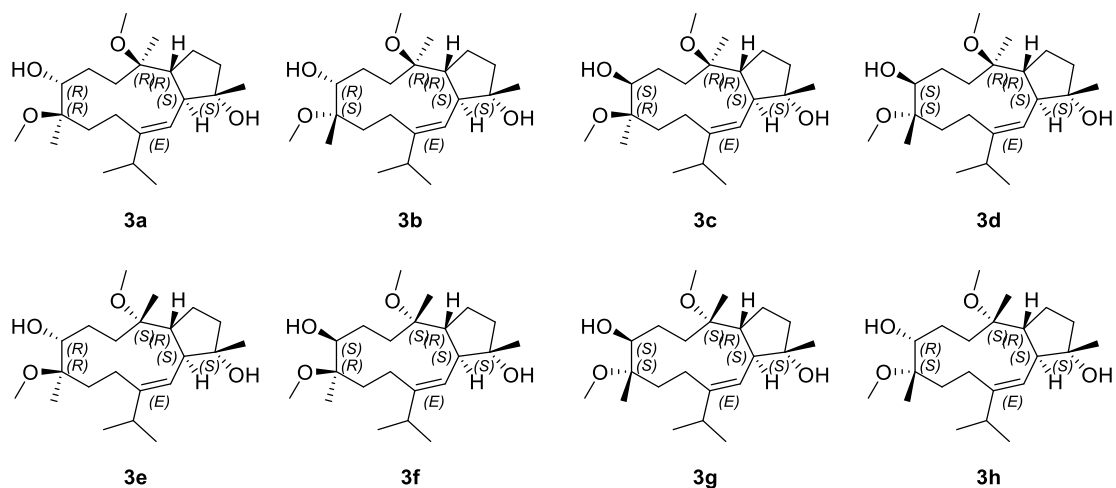

**Figure S57.** Structures of isomers of compound 3

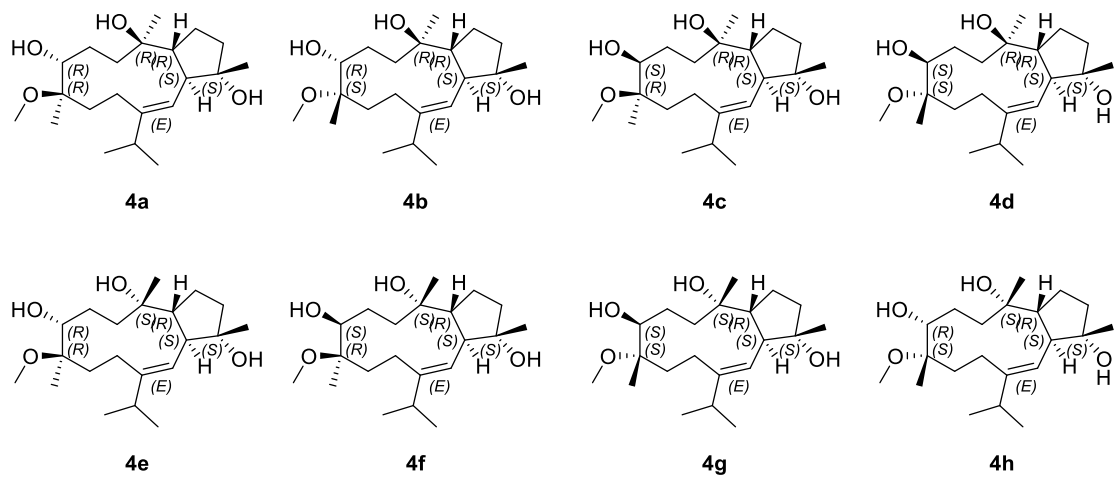

**Figure S58.** Structures of isomers of compound 4

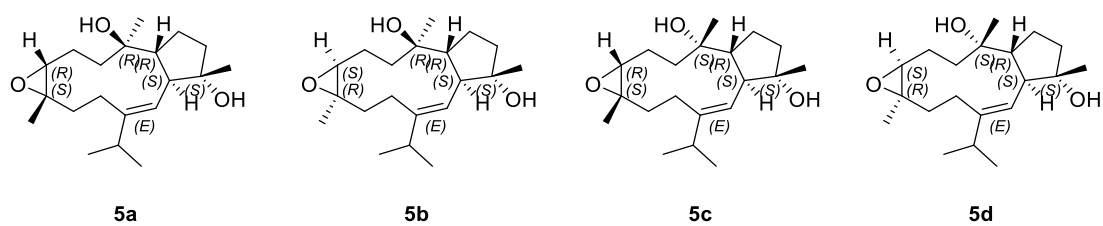

**Figure S59.** Structures of isomers of compound 5

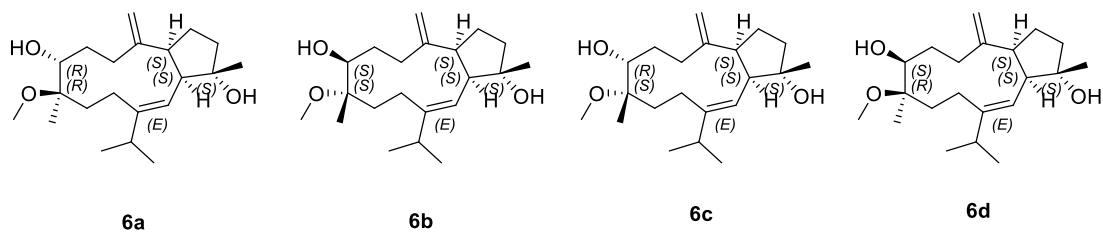

**Figure S60.** Structures of isomers of compound 6

| Isotropic shielding constants |        |        |        |        |        |        |        |        |
|-------------------------------|--------|--------|--------|--------|--------|--------|--------|--------|
| Nuclei                        | 1a     | 1b     | 1c     | 1d     | 1e     | 1f     | 1g     | 1h     |
| C 1                           | 37.63  | 33.52  | 30.47  | 34.12  | 32.46  | 31.77  | 29.26  | 29.49  |
| C 2                           | 52.77  | 54.73  | 55.88  | 56.26  | 55.41  | 54.43  | 59.12  | 58.44  |
| C 3                           | 129.05 | 131.43 | 131.21 | 130.88 | 129.85 | 133.59 | 131.63 | 132.77 |
| C 4                           | 97.65  | 99.30  | 100.91 | 99.01  | 97.48  | 101.62 | 99.22  | 99.62  |
| C 5                           | 149.80 | 148.38 | 145.73 | 148.62 | 149.17 | 145.04 | 148.20 | 145.59 |
| C 6                           | 160.04 | 160.75 | 158.89 | 161.14 | 159.32 | 158.76 | 161.20 | 158.37 |
| C 7                           | 131.73 | 129.49 | 130.41 | 128.62 | 132.36 | 127.65 | 132.42 | 133.37 |
| C 8                           | 103.18 | 104.59 | 103.06 | 105.02 | 102.87 | 102.47 | 103.45 | 104.77 |
| C 9                           | 152.78 | 152.97 | 155.17 | 149.92 | 148.21 | 151.35 | 150.54 | 153.58 |
| C 10                          | 155.43 | 159.25 | 160.96 | 161.66 | 156.51 | 157.43 | 160.53 | 157.35 |
| C 11                          | 113.46 | 108.75 | 105.82 | 106.88 | 112.52 | 108.72 | 105.20 | 105.51 |
| C 12                          | 101.23 | 102.14 | 102.73 | 101.65 | 101.17 | 103.08 | 101.57 | 104.09 |
| C 13                          | 154.44 | 152.86 | 152.08 | 152.93 | 154.24 | 151.09 | 153.01 | 153.64 |
| C 14                          | 156.09 | 163.34 | 163.31 | 163.92 | 156.19 | 162.91 | 163.99 | 164.24 |
| C 15                          | 144.00 | 150.77 | 150.46 | 150.49 | 144.17 | 151.16 | 150.09 | 150.84 |
| C 16                          | 164.13 | 163.91 | 163.40 | 163.89 | 164.22 | 164.13 | 163.81 | 164.06 |
| C 17                          | 165.83 | 165.95 | 166.06 | 166.21 | 166.25 | 166.12 | 166.33 | 166.58 |
| C 18                          | 161.45 | 160.27 | 161.64 | 160.75 | 161.19 | 162.34 | 160.06 | 160.12 |
| C 19                          | 159.47 | 161.39 | 162.00 | 160.97 | 166.91 | 163.29 | 168.26 | 165.42 |
| C 20                          | 171.14 | 164.00 | 168.22 | 168.37 | 171.66 | 167.72 | 169.48 | 163.04 |
| C 21                          | 137.64 | 136.59 | 137.26 | 136.66 | 138.97 | 137.32 | 138.81 | 138.72 |
| C 22                          | 136.58 | 136.35 | 137.30 | 136.57 | 136.55 | 136.87 | 136.55 | 135.67 |

**Table S1.** Boltzmann averaged GIAO isotropic magnetic shielding constants ( $\sigma$ ) of compound **1** calculated at the PCM/mPW1PW91/6-311G(d,p) //B3LYP/6-31G (d) level of theory.

| Functional       | Solvent? | Basis Set    |          | Type of Data      |          |          |          |          |
|------------------|----------|--------------|----------|-------------------|----------|----------|----------|----------|
| mPW1PW91         | PCM      | 6-311+G(d,p) |          | Shielding Tensors |          |          |          |          |
|                  |          | Isomer 1     | Isomer 2 | Isomer 3          | Isomer 4 | Isomer 5 | Isomer 6 | Isomer 7 |
| sDP4+ (H data)   |          | 0.00%        | 0.16%    | 0.02%             | 6.94%    | 0.04%    | 0.07%    | 74.29%   |
| sDP4+ (C data)   |          | 0.00%        | 0.00%    | 0.00%             | 0.00%    | 0.00%    | 0.00%    | 99.99%   |
| sDP4+ (all data) |          | 0.00%        | 0.00%    | 0.00%             | 0.00%    | 0.00%    | 0.00%    | 100.00%  |
| uDP4+ (H data)   |          | 0.00%        | 26.77%   | 1.39%             | 2.14%    | 0.01%    | 0.07%    | 14.14%   |
| uDP4+ (C data)   |          | 0.00%        | 3.85%    | 0.09%             | 0.30%    | 0.00%    | 0.03%    | 2.39%    |
| uDP4+ (all data) |          | 0.00%        | 1.94%    | 0.00%             | 0.01%    | 0.00%    | 0.00%    | 0.64%    |
| DP4+ (H data)    |          | 0.00%        | 0.20%    | 0.00%             | 0.71%    | 0.00%    | 0.00%    | 50.15%   |
| DP4+ (C data)    |          | 0.00%        | 0.00%    | 0.00%             | 0.00%    | 0.00%    | 0.00%    | 99.80%   |
| DP4+ (all data)  |          | 0.00%        | 0.00%    | 0.00%             | 0.00%    | 0.00%    | 0.00%    | 99.81%   |

**Table S2.** DP4+ results obtained using experimental data of compound **1** versus isomers **1a–1h**.

| Isotropic shielding constants |        |        |        |        |        |        |        |        |
|-------------------------------|--------|--------|--------|--------|--------|--------|--------|--------|
| Nuclei                        | 3a     | 3b     | 3c     | 3d     | 3e     | 3f     | 3g     | 3h     |
| C 1                           | 33.58  | 26.51  | 30.47  | 33.85  | 32.04  | 31.65  | 33.14  | 28.68  |
| C 2                           | 53.06  | 59.06  | 55.88  | 53.79  | 51.29  | 54.10  | 54.53  | 53.65  |
| C 3                           | 130.92 | 131.96 | 131.21 | 133.91 | 133.34 | 133.92 | 133.68 | 132.08 |
| C 4                           | 99.41  | 102.05 | 100.91 | 102.34 | 100.04 | 101.53 | 101.94 | 100.29 |
| C 5                           | 146.04 | 148.39 | 145.73 | 144.55 | 145.28 | 144.91 | 144.87 | 144.94 |
| C 6                           | 159.61 | 160.61 | 158.89 | 160.44 | 157.99 | 158.43 | 159.65 | 158.87 |
| C 7                           | 132.13 | 140.04 | 130.41 | 128.59 | 122.31 | 127.37 | 127.65 | 133.78 |
| C 8                           | 102.89 | 104.08 | 103.06 | 103.27 | 105.64 | 102.39 | 102.96 | 104.04 |
| C 9                           | 154.79 | 151.77 | 155.17 | 153.52 | 150.10 | 151.59 | 149.56 | 153.12 |
| C 10                          | 154.82 | 157.13 | 160.96 | 155.92 | 159.87 | 156.61 | 156.26 | 156.13 |
| C 11                          | 113.80 | 103.07 | 105.82 | 106.60 | 108.03 | 109.88 | 106.53 | 112.01 |
| C 12                          | 101.61 | 102.69 | 102.73 | 102.11 | 101.87 | 101.41 | 102.61 | 101.63 |
| C 13                          | 154.44 | 144.76 | 152.08 | 152.07 | 153.87 | 152.22 | 149.32 | 154.95 |
| C 14                          | 155.35 | 163.30 | 163.31 | 164.47 | 156.46 | 163.33 | 161.55 | 159.60 |
| C 15                          | 144.19 | 150.17 | 150.46 | 151.73 | 147.85 | 151.12 | 152.18 | 149.97 |
| C 16                          | 163.49 | 162.85 | 163.40 | 164.00 | 164.23 | 163.97 | 164.48 | 162.45 |
| C 17                          | 165.68 | 166.16 | 166.06 | 166.29 | 165.85 | 166.09 | 166.38 | 164.25 |
| C 18                          | 162.24 | 163.42 | 161.64 | 163.49 | 161.59 | 162.33 | 162.88 | 161.16 |
| C 19                          | 159.64 | 161.32 | 162.00 | 167.66 | 162.60 | 163.38 | 164.99 | 160.24 |
| C 20                          | 170.93 | 169.96 | 168.22 | 163.00 | 168.50 | 168.35 | 166.66 | 168.75 |
| C 21                          | 137.81 | 138.00 | 137.26 | 137.80 | 136.35 | 137.10 | 137.61 | 137.61 |
| C 22                          | 136.40 | 133.12 | 137.30 | 135.57 | 136.61 | 136.20 | 135.81 | 137.66 |

**Table S3.** Boltzmann averaged GIAO isotropic magnetic shielding constants ( $\sigma$ ) of compound **3** calculated at the PCM/mPW1PW91/6-311G(d,p) //B3LYP/6-31G (d) level of theory.

| Functional       | Solvent? |          | Basis Set     |          | Type of Data      |          |          |          |
|------------------|----------|----------|---------------|----------|-------------------|----------|----------|----------|
| mPW1PW91         | PCM      |          | 6-311+G(d, p) |          | Shielding Tensors |          |          |          |
|                  | Isomer 1 | Isomer 2 | Isomer 3      | Isomer 4 | Isomer 5          | Isomer 6 | Isomer 7 | Isomer 8 |
| sDP4+ (H data)   | 95.80%   | 0.00%    | 4.20%         | 0.00%    | 0.00%             | 0.00%    | 0.00%    | 0.00%    |
| sDP4+ (C data)   | 0.00%    | 0.00%    | 100.00%       | 0.00%    | 0.00%             | 0.00%    | 0.00%    | 0.00%    |
| sDP4+ (all data) | 0.00%    | 0.00%    | 100.00%       | 0.00%    | 0.00%             | 0.00%    | 0.00%    | 0.00%    |
| uDP4+ (H data)   | 0.00%    | 0.00%    | 100.00%       | 0.00%    | 0.00%             | 0.00%    | 0.00%    | 0.00%    |
| uDP4+ (C data)   | 0.00%    | 0.00%    | 99.88%        | 0.01%    | 0.00%             | 0.01%    | 0.09%    | 0.00%    |
| uDP4+ (all data) | 0.00%    | 0.00%    | 100.00%       | 0.00%    | 0.00%             | 0.00%    | 0.00%    | 0.00%    |
| DP4+ (H data)    | 0.02%    | 0.00%    | 99.98%        | 0.00%    | 0.00%             | 0.00%    | 0.00%    | 0.00%    |
| DP4+ (C data)    | 0.00%    | 0.00%    | 100.00%       | 0.00%    | 0.00%             | 0.00%    | 0.00%    | 0.00%    |
| DP4+ (all data)  | 0.00%    | 0.00%    | 100.00%       | 0.00%    | 0.00%             | 0.00%    | 0.00%    | 0.00%    |

**Table S4.** DP4+ results obtained using experimental data of compound **3** versus isomers **3a–3h**.

| Isotropic shielding constants |       |       |       |       |       |       |       |       |
|-------------------------------|-------|-------|-------|-------|-------|-------|-------|-------|
| Nuclei                        | 4a    | 4b    | 4c    | 4d    | 4e    | 4f    | 4g    | 4h    |
| C 1                           | 7.93  | 5.84  | 6.58  | 7.32  | 14.04 | 9.56  | 6.64  | 7.92  |
| C 2                           | 13.86 | 11.70 | 11.49 | 13.09 | 22.00 | 15.96 | 13.39 | 13.84 |
| C 3                           | 33.31 | 26.94 | 27.87 | 32.29 | 57.00 | 38.56 | 30.98 | 33.13 |
| C 4                           | 25.18 | 20.68 | 21.08 | 24.54 | 42.56 | 29.32 | 23.71 | 24.83 |
| C 5                           | 36.51 | 29.92 | 30.30 | 35.52 | 62.84 | 41.90 | 34.18 | 36.10 |
| C 6                           | 40.36 | 32.55 | 33.40 | 38.94 | 67.98 | 46.37 | 37.35 | 39.95 |
| C 7                           | 32.28 | 26.10 | 26.67 | 31.07 | 52.80 | 36.62 | 29.71 | 32.05 |
| C 8                           | 27.37 | 22.11 | 22.88 | 26.29 | 46.61 | 31.78 | 25.35 | 27.03 |
| C 9                           | 35.97 | 31.44 | 30.48 | 37.06 | 61.45 | 42.70 | 36.02 | 35.39 |
| C 10                          | 39.72 | 33.09 | 32.59 | 38.16 | 67.33 | 45.61 | 37.97 | 39.28 |
| C 11                          | 27.01 | 21.59 | 22.33 | 27.35 | 46.94 | 31.50 | 24.87 | 26.21 |
| C 12                          | 25.74 | 20.86 | 21.62 | 24.98 | 44.03 | 29.43 | 24.39 | 25.72 |
| C 13                          | 38.12 | 31.32 | 31.58 | 37.78 | 66.23 | 44.03 | 35.65 | 37.04 |
| C 14                          | 41.06 | 33.58 | 34.20 | 39.28 | 67.49 | 46.43 | 38.36 | 40.28 |
| C 15                          | 37.96 | 30.80 | 31.66 | 36.81 | 63.96 | 44.25 | 35.36 | 37.71 |
| C 16                          | 41.21 | 33.49 | 34.26 | 39.81 | 70.62 | 47.61 | 38.48 | 40.85 |
| C 17                          | 41.76 | 34.06 | 34.73 | 40.35 | 71.21 | 48.17 | 39.10 | 41.36 |
| C 18                          | 40.79 | 33.14 | 34.05 | 39.45 | 69.55 | 47.23 | 38.03 | 40.39 |
| C 19                          | 39.95 | 31.51 | 33.18 | 38.00 | 71.55 | 45.89 | 36.27 | 39.54 |
| C 20                          | 42.30 | 34.80 | 34.11 | 41.14 | 73.08 | 48.77 | 39.58 | 41.63 |
| C 21                          | 34.36 | 28.06 | 28.39 | 33.61 | 58.99 | 39.78 | 32.38 | 33.96 |
| C 22                          | 7.93  | 5.84  | 6.58  | 7.32  | 14.04 | 9.56  | 6.64  | 7.92  |

**Table S5.** Boltzmann averaged GIAO isotropic magnetic shielding constants ( $\sigma$ ) of compound **4** calculated at the PCM/mPW1PW91/6-311G(d,p) //B3LYP/6-31G (d) level of theory.

| Functional       | Solvent? |          | Basis Set      |          | Type of Data      |          |          |          |
|------------------|----------|----------|----------------|----------|-------------------|----------|----------|----------|
| mPW1PW91         | PCM      |          | 6-311+G (d, p) |          | Shielding Tensors |          |          |          |
|                  | Isomer 1 | Isomer 2 | Isomer 3       | Isomer 4 | Isomer 5          | Isomer 6 | Isomer 7 | Isomer 8 |
| sDP4+ (H data)   | –        | –        | –              | –        | –                 | –        | –        | –        |
| sDP4+ (C data)   | 0.00%    | 32.09%   | 0.00%          | 0.00%    | 0.00%             | 0.00%    | 67.91%   | 0.00%    |
| sDP4+ (all data) | 0.00%    | 32.09%   | 0.00%          | 0.00%    | 0.00%             | 0.00%    | 67.91%   | 0.00%    |
| uDP4+ (H data)   | –        | –        | –              | –        | –                 | –        | –        | –        |
| uDP4+ (C data)   | 0.00%    | 0.00%    | 0.00%          | 0.00%    | 100.00%           | 0.00%    | 0.00%    | 0.00%    |
| uDP4+ (all data) | 0.00%    | 0.00%    | 0.00%          | 0.00%    | 100.00%           | 0.00%    | 0.00%    | 0.00%    |
| DP4+ (H data)    | –        | –        | –              | –        | –                 | –        | –        | –        |
| DP4+ (C data)    | 0.00%    | 0.00%    | 0.00%          | 0.00%    | 100.00%           | 0.00%    | 0.00%    | 0.00%    |
| DP4+ (all data)  | 0.00%    | 0.00%    | 0.00%          | 0.00%    | 100.00%           | 0.00%    | 0.00%    | 0.00%    |

**Table S6.** DP4+ results obtained using experimental data of compound **4** *versus* isomers **4a–4h**.

| Isotropic shielding constants |        |        |        |        |
|-------------------------------|--------|--------|--------|--------|
| Nuclei                        | 5a     | 5b     | 5c     | 5d     |
| C 1                           | 31.54  | 30.54  | 34.06  | 32.03  |
| C 2                           | 53.43  | 53.93  | 49.30  | 55.63  |
| C 3                           | 131.96 | 132.11 | 133.44 | 133.37 |
| C 4                           | 100.43 | 99.70  | 99.01  | 100.19 |
| C 5                           | 144.26 | 145.59 | 145.33 | 145.07 |
| C 6                           | 159.22 | 157.58 | 159.17 | 160.55 |
| C 7                           | 124.95 | 126.86 | 122.52 | 129.88 |
| C 8                           | 109.58 | 107.19 | 111.86 | 109.18 |
| C 9                           | 153.65 | 141.92 | 149.46 | 144.88 |
| C 10                          | 158.09 | 160.34 | 161.50 | 160.41 |
| C 11                          | 121.73 | 119.03 | 118.65 | 119.70 |
| C 12                          | 123.64 | 119.60 | 122.90 | 120.49 |
| C 13                          | 146.14 | 151.66 | 155.42 | 150.12 |
| C 14                          | 158.77 | 160.66 | 154.20 | 159.69 |
| C 15                          | 151.03 | 150.44 | 143.62 | 151.11 |
| C 16                          | 166.09 | 166.01 | 165.87 | 166.27 |
| C 17                          | 162.49 | 163.80 | 163.57 | 164.19 |
| C 18                          | 161.16 | 160.75 | 162.34 | 162.71 |
| C 19                          | 153.40 | 161.75 | 155.89 | 160.80 |
| C 20                          | 31.54  | 30.54  | 34.06  | 32.03  |

**Table S7.** Boltzmann averaged GIAO isotropic magnetic shielding constants ( $\sigma$ ) of compound **5** calculated at the PCM/mPW1PW91/6-311G(d,p) //B3LYP/6-31G (d) level of theory.

| Functional       | Solvent? |          | Basis Set    |          | Type of Data      |          |
|------------------|----------|----------|--------------|----------|-------------------|----------|
| mPW1PW91         | PCM      |          | 6-311G(d, p) |          | Shielding Tensors |          |
|                  | Isomer 1 | Isomer 2 | Isomer 3     | Isomer 4 | Isomer 5          | Isomer 6 |
| sDP4+ (H data)   | –        | –        | –            | –        | –                 | –        |
| sDP4+ (C data)   | 0.00%    | 0.26%    | 0.00%        | 99.74%   | –                 | –        |
| sDP4+ (all data) | 0.00%    | 0.26%    | 0.00%        | 99.74%   | –                 | –        |
| uDP4+ (H data)   | –        | –        | –            | –        | –                 | –        |
| uDP4+ (C data)   | 0.00%    | 0.00%    | 0.00%        | 100.00%  | –                 | –        |
| uDP4+ (all data) | 0.00%    | 0.00%    | 0.00%        | 100.00%  | –                 | –        |
| DP4+ (H data)    | –        | –        | –            | –        | –                 | –        |
| DP4+ (C data)    | 0.00%    | 0.00%    | 0.00%        | 100.00%  | –                 | –        |
| DP4+ (all data)  | 0.00%    | 0.00%    | 0.00%        | 100.00%  | –                 | –        |

**Table S8.** DP4+ results obtained using experimental data of compound **5** *versus* isomers **5a–5d**.

| Isotropic shielding constants |       |       |       |       |
|-------------------------------|-------|-------|-------|-------|
| Nuclei                        | 6a    | 6b    | 6c    | 6d    |
| C 1                           | 6.10  | 6.70  | 8.30  | 9.50  |
| C 2                           | 9.70  | 10.40 | 12.80 | 14.10 |
| C 3                           | 19.20 | 19.10 | 24.40 | 26.40 |
| C 4                           | 15.00 | 15.10 | 19.40 | 21.00 |
| C 5                           | 21.10 | 21.30 | 27.40 | 29.50 |
| C 6                           | 22.50 | 22.60 | 29.10 | 31.10 |
| C 7                           | 19.30 | 19.40 | 25.20 | 27.00 |
| C 8                           | 5.40  | 6.20  | 8.20  | 8.50  |
| C 9                           | 21.50 | 21.40 | 27.60 | 29.70 |
| C 10                          | 22.10 | 21.90 | 28.50 | 30.40 |
| C 11                          | 16.20 | 16.20 | 21.70 | 22.30 |
| C 12                          | 15.27 | 15.34 | 19.80 | 21.34 |
| C 13                          | 22.41 | 22.17 | 28.54 | 30.64 |
| C 14                          | 23.25 | 23.30 | 29.07 | 32.20 |
| C 15                          | 21.74 | 21.77 | 27.78 | 30.24 |
| C 16                          | 23.49 | 23.58 | 29.78 | 32.36 |
| C 17                          | 23.43 | 23.31 | 29.76 | 32.74 |
| C 18                          | 23.04 | 22.93 | 29.48 | 31.87 |
| C 19                          | 11.20 | 11.58 | 15.07 | 16.04 |
| C 20                          | 26.17 | 24.03 | 30.94 | 33.10 |
| C 21                          | 20.01 | 19.89 | 25.57 | 27.60 |

**Table S9.** Boltzmann averaged GIAO isotropic magnetic shielding constants ( $\sigma$ ) of compound **6** calculated at the PCM/mPW1PW91/6-31G(d,p) //B3LYP/6-31G (d) level of theory.

| Functional       | Solvent? |          | Basis Set    |          | Type of Data      |          |
|------------------|----------|----------|--------------|----------|-------------------|----------|
| mPW1PW91         | PCM      |          | 6-31G (d, p) |          | Shielding Tensors |          |
|                  | Isomer 1 | Isomer 2 | Isomer 3     | Isomer 4 | Isomer 5          | Isomer 6 |
| sDP4+ (H data)   | –        | –        | –            | –        | –                 | –        |
| sDP4+ (C data)   | 0.00%    | 2.04%    | 0.00%        | 97.95%   | –                 | –        |
| sDP4+ (all data) | 0.00%    | 2.04%    | 0.00%        | 97.95%   | –                 | –        |
| uDP4+ (H data)   | –        | –        | –            | –        | –                 | –        |
| uDP4+ (C data)   | 0.05%    | 0.06%    | 12.29%       | 87.61%   | –                 | –        |
| uDP4+ (all data) | 0.05%    | 0.06%    | 12.29%       | 87.61%   | –                 | –        |
| DP4+ (H data)    | –        | –        | –            | –        | –                 | –        |
| DP4+ (C data)    | 0.00%    | 0.00%    | 0.00%        | 100.00%  | –                 | –        |
| DP4+ (all data)  | 0.00%    | 0.00%    | 0.00%        | 100.00%  | –                 | –        |

**Table S10.** DP4+ results obtained using experimental data of compound **6** versus isomers **6a–6d**.

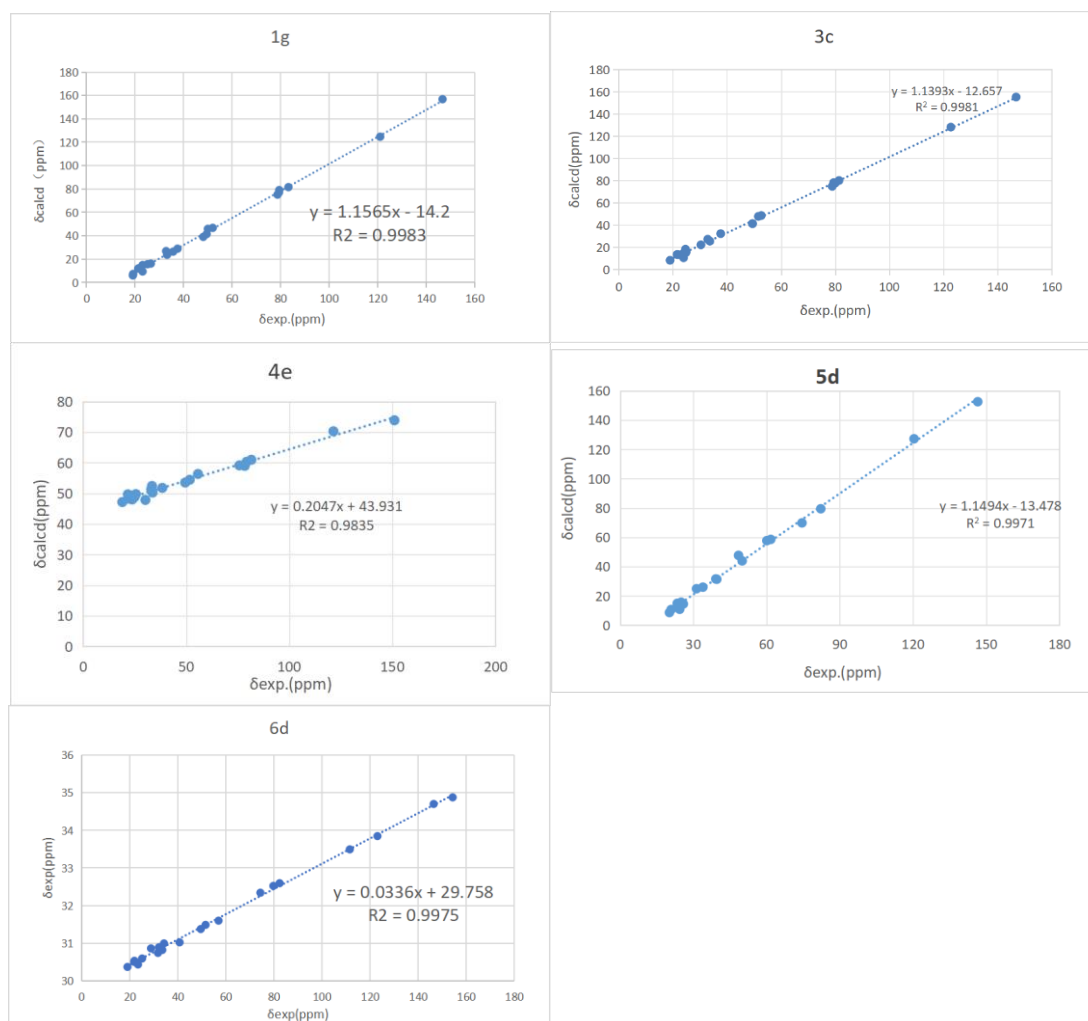

**Figure S61.** Correlation plots of compounds **1**, **3–6**

**Table S11.** Crystal data and structure refinement for **2**

|                                             |                                                               |
|---------------------------------------------|---------------------------------------------------------------|
| Identification code                         | 3e-83                                                         |
| Empirical formula                           | C <sub>21</sub> H <sub>37</sub> O <sub>3.5</sub>              |
| Formula weight                              | 345.50                                                        |
| Temperature/K                               | 169.99(10)                                                    |
| Crystal system                              | orthorhombic                                                  |
| Space group                                 | P2 <sub>1</sub> 2 <sub>1</sub> 2 <sub>1</sub>                 |
| a/Å                                         | 9.5531(6)                                                     |
| b/Å                                         | 15.2772(15)                                                   |
| c/Å                                         | 28.949(5)                                                     |
| α/°                                         | 90                                                            |
| β/°                                         | 90                                                            |
| γ/°                                         | 90                                                            |
| Volume/Å <sup>3</sup>                       | 4224.9(8)                                                     |
| Z                                           | 8                                                             |
| ρ <sub>calc</sub> /cm <sup>3</sup>          | 1.086                                                         |
| μ/mm <sup>-1</sup>                          | 0.564                                                         |
| F(000)                                      | 1528.0                                                        |
| Crystal size/mm <sup>3</sup>                | 0.15 × 0.12 × 0.1                                             |
| Radiation                                   | Cu Kα (λ = 1.54184)                                           |
| 2θ range for data collection/°              | 8.416 to 147.908                                              |
| Index ranges                                | -11 ≤ h ≤ 7, -18 ≤ k ≤ 18, -33 ≤ l ≤ 35                       |
| Reflections collected                       | 16223                                                         |
| Independent reflections                     | 8320 [R <sub>int</sub> = 0.1057, R <sub>sigma</sub> = 0.2540] |
| Data/restraints/parameters                  | 8320/391/471                                                  |
| Goodness-of-fit on F <sup>2</sup>           | 1.021                                                         |
| Final R indexes [I > 2σ (I)]                | R <sub>1</sub> = 0.0784, wR <sub>2</sub> = 0.1767             |
| Final R indexes [all data]                  | R <sub>1</sub> = 0.2369, wR <sub>2</sub> = 0.2254             |
| Largest diff. peak/hole / e Å <sup>-3</sup> | 0.50/-0.24                                                    |
| Flack parameter                             | -0.3(4)                                                       |
